# Supplementary material for: Motion-triggered video cameras reveal spatial and temporal patterns of red fox foraging on carrion provided by mountain lions
Source: PeerJ. 2018 Jul 31;6:e5324. doi: 10.7717/peerj.5324 (PMC6074758; doi:10.7717/peerj.5324)
Supplement: Supplemental Information 2 — Database used to catalog video footage from mountain lion kill sites. [file peerj-06-5324-s002.xlsx]

## Sheet: KS_Vds
Unique Video ID	KSID	Date and Time	Anything?	Cat ID	Scavengers	Behaviour	Vocalization	CatInteraction	Scavenger Interaction?	Number of Animals	Comments
888354	10	2013-04-17 04:21:14	Yes	F96		Feeding	No	No	No	1
888220	10	2013-04-16 19:53:26	Yes	F96		Feeding	No	No	No	1
888221	10	2013-04-16 19:55:38	Yes	F96		Feeding	No	No	No	1
888222	10	2013-04-16 19:58:38	Yes	F96		Feeding	No	No	No	1
888223	10	2013-04-16 20:00:24	Yes	F96		Feeding	No	No	No	1
888224	10	2013-04-16 20:02:08	Yes	F96		Feeding	No	No	No	1
888225	10	2013-04-16 20:03:38	Yes	M80		Feeding	No	No	No	1
888226	10	2013-04-16 20:05:38	Yes	M80		Feeding	No	No	No	1
888227	10	2013-04-16 20:07:38	Yes	M80		Feeding	No	No	No	1
888228	10	2013-04-16 20:11:04	Yes	F96, M80		Feeding	Yes	Yes	No	2
888229	10	2013-04-16 20:12:34	Yes	F61, F96, M80		Feeding	No	Yes	No	3
888230	10	2013-04-16 20:14:26	Yes	F61, M80		Feeding	No	No	No	2
888231	10	2013-04-16 20:17:30	Yes	F96, M80		Feeding	No	No	No	2
888232	10	2013-04-16 20:19:02	Yes	F61, F96, M80		Feeding	No	No	No	3
888233	10	2013-04-16 20:21:04	Yes	F61, M80		Feeding	No	No	No	2
888234	10	2013-04-16 20:23:16	Yes	F61, M80		Feeding	No	No	No	2
888328	10	2013-04-17 03:29:40	Yes	F61, F96, M80		Feeding	No	Yes	No	3
888329	10	2013-04-17 03:32:08	Yes	F96, M80		Feeding	Yes	Yes	No	2
888330	10	2013-04-17 03:33:38	Yes	M80		Feeding	No	No	No	1
888331	10	2013-04-17 03:35:12	Yes	M80		Feeding	No	No	No	1
888332	10	2013-04-17 03:36:48	Yes	M80		Feeding	No	No	No	1
888333	10	2013-04-17 03:38:40	Yes	M80		Feeding	No	No	No	1
888334	10	2013-04-17 03:41:14	Yes	M80		Feeding	No	No	No	1
888335	10	2013-04-17 03:43:26	Yes	M80		Feeding	No	No	No	1
888336	10	2013-04-17 03:44:58	Yes	M80		Feeding	No	No	No	1
888337	10	2013-04-17 03:46:36	Yes	M80		Feeding	No	No	No	1
888338	10	2013-04-17 03:48:12	Yes	M80		Feeding	No	No	No	1
888339	10	2013-04-17 03:49:50	Yes	M80		Feeding	No	No	No	1
888340	10	2013-04-17 03:51:28	Yes	M80		Feeding	No	No	No	1
888341	10	2013-04-17 03:52:58	Yes	M80		Feeding	No	No	No	1
888342	10	2013-04-17 03:55:04	Yes	M80		Feeding	No	No	No	1
888343	10	2013-04-17 03:57:12	Yes	M80		Feeding	No	No	No	1
888344	10	2013-04-17 03:59:14	Yes	M80		Feeding	No	No	No	1
888345	10	2013-04-17 04:02:44	Yes	M80		Feeding	No	No	No	1
888346	10	2013-04-17 04:04:18	Yes	M80		Feeding	No	No	No	1
888347	10	2013-04-17 04:05:52	Yes	M80		Feeding	No	No	No	1
888348	10	2013-04-17 04:08:14	Yes	F96		Feeding	No	No	No	1
888349	10	2013-04-17 04:09:52	Yes	F96		Feeding	No	No	No	1
888350	10	2013-04-17 04:11:48	Yes	F96		Feeding	No	No	No	1
888351	10	2013-04-17 04:13:24	Yes	F96		Feeding	No	No	No	1
888352	10	2013-04-17 04:15:26	Yes	F96		Feeding	No	No	No	1
888353	10	2013-04-17 04:19:30	Yes	F96		Feeding	No	No	No	1
866217	10	2013-04-16 13:06:32	No							0
866218	10	2013-04-16 13:08:52	No							0
866219	10	2013-04-16 13:11:40	No							0
866220	10	2013-04-16 13:13:50	No							0
866221	10	2013-04-16 13:16:08	No							0
866222	10	2013-04-16 13:18:16	No							0
866223	10	2013-04-16 13:20:40	No							0
866224	10	2013-04-16 13:22:58	No							0
866225	10	2013-04-16 13:25:20	No							0
866226	10	2013-04-16 13:28:22	No							0
866227	10	2013-04-16 13:31:00	No							0
866228	10	2013-04-16 13:34:26	No							0
866229	10	2013-04-16 13:37:00	No							0
866230	10	2013-04-16 13:39:22	No							0
866231	10	2013-04-16 13:42:42	No							0
866232	10	2013-04-16 13:44:50	No							0
866233	10	2013-04-16 13:48:00	No							0
866234	10	2013-04-16 13:50:44	No							0
866235	10	2013-04-16 13:53:42	No							0
888235	10	2013-04-16 20:26:04	Yes	F61, M80		Feeding	No	No	No	2
888236	10	2013-04-16 20:28:00	No							0
888237	10	2013-04-16 20:29:40	Yes	F61, F96, M80		Feeding	No	Yes	No	3	61 sits on frostbite
888238	10	2013-04-16 20:31:16	Yes	F61, F96, M80		Feeding	Yes	Yes	No	3
888239	10	2013-04-16 20:33:02	Yes	F61, F96, M80		Feeding	No	No	No	3
888240	10	2013-04-16 20:34:34	Yes	F61		Feeding	No	No	No	1
888241	10	2013-04-16 20:36:16	Yes	F61		Feeding	No	No	No	1
888242	10	2013-04-16 20:37:46	Yes	F61, F96, M80		Feeding	No	Yes	No	3
888243	10	2013-04-16 20:39:24	Yes	F61, F96, M80		Feeding	No	No	No	3
888244	10	2013-04-16 20:40:54	Yes	F61, F96, M80		Feeding	No	No	No	3
888245	10	2013-04-16 20:42:26	Yes	F61, F96, M80		Feeding	No	No	No	3
888246	10	2013-04-16 20:43:54	Yes	F61, F96		Feeding	No	No	No	2
888247	10	2013-04-16 20:45:32	Yes	F61, F96		Feeding	No	No	No	2
888248	10	2013-04-16 20:47:04	Yes	F61, F96		Feeding	No	No	No	2
888249	10	2013-04-16 20:48:34	Yes	F61, F96		Feeding	No	No	No	2
888250	10	2013-04-16 20:50:18	Yes	F61, F96		Feeding	No	No	No	2
888251	10	2013-04-16 20:51:54	Yes	F61		Feeding	No	No	No	1
888252	10	2013-04-16 20:53:28	Yes	F61		Feeding	No	No	No	1
888253	10	2013-04-16 20:58:50	Yes	F61		Feeding	No	No	No	1
888254	10	2013-04-16 21:00:20	Yes	F61		Feeding	No	No	No	1
888255	10	2013-04-16 21:01:52	Yes	F61, F96		Feeding	No	No	No	2
888256	10	2013-04-16 21:03:22	Yes	F61, F96, M80		Feeding	No	Yes	No	3
888257	10	2013-04-16 21:04:52	Yes	F61, F96, M80		Feeding	No	Yes	No	3
888258	10	2013-04-16 21:06:22	Yes	F61, F96, M80		Feeding	No	Yes	No	3
888259	10	2013-04-16 21:07:52	Yes	F61, F96, M80		Feeding	No	Yes	No	3
888260	10	2013-04-16 21:09:22	Yes	F61, F96, M80		Feeding	No	No	No	3
888261	10	2013-04-16 21:12:14	Yes	F61, F96, M80		Nothing	No	Yes	No	3
888262	10	2013-04-16 21:14:04	No							0
888263	10	2013-04-16 21:57:56	Yes	F61		Feeding	No	No	No	1
888264	10	2013-04-16 21:59:28	Yes	F61, M80		Feeding	No	No	No	2
888265	10	2013-04-16 22:00:56	Yes	F61		Feeding	No	No	No	1
888266	10	2013-04-16 22:02:30	Yes	F61		Feeding	No	No	No	1
888267	10	2013-04-16 22:04:18	Yes	F61		Feeding	No	No	No	1
888268	10	2013-04-16 22:05:48	Yes	F61		Feeding	No	No	No	1
888269	10	2013-04-16 22:07:20	Yes	F61		Feeding	No	No	No	1
888270	10	2013-04-16 22:08:54	Yes	F61		Feeding	No	No	No	1
888271	10	2013-04-16 22:10:26	Yes	F61		Feeding	No	No	No	1
888272	10	2013-04-16 22:11:56	Yes	F61, F96		Feeding	No	No	No	2
888273	10	2013-04-16 22:14:12	Yes	F96		Feeding	No	No	No	1
888274	10	2013-04-16 22:15:44	Yes	F96		Feeding	No	No	No	1
888275	10	2013-04-16 22:20:42	Yes	F96		Feeding	No	No	No	1
888276	10	2013-04-16 22:23:02	Yes	F96		Nothing	No	No	No	1
888277	10	2013-04-16 23:53:38	Yes	M80		Feeding	No	No	No	1
888278	10	2013-04-16 23:55:40	Yes	M80		Feeding	No	No	No	1
888279	10	2013-04-16 23:57:24	Yes	M80		Feeding	No	No	No	1
888280	10	2013-04-16 23:59:14	Yes	M80		Feeding	No	No	No	1
888281	10	2013-04-17 00:01:14	Yes	M80		Feeding	No	No	No	1
888282	10	2013-04-17 00:03:04	Yes	M80		Feeding	No	No	No	1
888283	10	2013-04-17 00:05:42	Yes	M80		Feeding	No	No	No	1
888284	10	2013-04-17 00:07:14	Yes	M80		Feeding	No	No	No	1
888285	10	2013-04-17 02:10:56	Yes	F96		Feeding	No	No	No	1
888286	10	2013-04-17 02:12:50	Yes	F96		Feeding	No	No	No	1
888287	10	2013-04-17 02:15:30	Yes	F96		Feeding	No	No	No	1
888288	10	2013-04-17 02:17:10	Yes	F96		Feeding	No	No	No	1
888289	10	2013-04-17 02:18:42	Yes	F96		Feeding	No	No	No	1
888290	10	2013-04-17 02:20:58	Yes	F96		Feeding	No	No	No	1
888291	10	2013-04-17 02:22:50	Yes	F96		Feeding	No	No	No	1
888292	10	2013-04-17 02:26:00	Yes	F96		Feeding	No	No	No	1
888293	10	2013-04-17 02:28:48	Yes	F96		Feeding	No	No	No	1
888294	10	2013-04-17 02:30:22	Yes	F96		Feeding	No	No	No	1
888295	10	2013-04-17 02:32:10	No							0
888296	10	2013-04-17 02:33:48	Yes	F96		Feeding	No	No	No	1
888297	10	2013-04-17 02:35:20	Yes	F96		Feeding	No	No	No	1
888298	10	2013-04-17 02:36:50	Yes	F96		Feeding	No	No	No	1
888299	10	2013-04-17 02:38:40	Yes	F96		Feeding	No	No	No	1
888300	10	2013-04-17 02:40:18	Yes	F96		Feeding	No	No	No	1
888301	10	2013-04-17 02:42:46	Yes	F96		Feeding	No	No	No	1
888302	10	2013-04-17 02:48:24	Yes	F61, F96		Feeding	No	No	No	2
888303	10	2013-04-17 02:49:54	Yes	F61, F96		Feeding	No	No	No	2
888304	10	2013-04-17 02:51:24	Yes	F61, F96		Feeding	No	No	No	2
888305	10	2013-04-17 02:52:54	Yes	F61, F96		Feeding	No	No	No	2
888306	10	2013-04-17 02:54:24	Yes	F61		Feeding	No	No	No	1
888307	10	2013-04-17 02:55:56	Yes	F61, M80		Feeding	No	No	No	2
888308	10	2013-04-17 02:57:26	Yes	F61, M80		Feeding	No	No	No	2
888309	10	2013-04-17 02:58:56	Yes	F61, M80		Feeding	No	No	No	2
888310	10	2013-04-17 03:00:26	Yes	F61, M80		Feeding	No	No	No	2
888311	10	2013-04-17 03:02:02	Yes	F61, F96, M80		Feeding	No	No	No	3
888312	10	2013-04-17 03:03:34	Yes	F61, F96, M80		Feeding	No	No	No	3
888313	10	2013-04-17 03:05:04	Yes	F61, M80		Feeding	No	No	No	2
888314	10	2013-04-17 03:06:44	Yes	F61, M80		Feeding	No	No	No	2
888315	10	2013-04-17 03:08:16	Yes	F61, M80		Feeding	No	No	No	2
888316	10	2013-04-17 03:09:46	Yes	F61, M80		Feeding	No	No	No	2
888317	10	2013-04-17 03:11:18	Yes	F61, M80		Feeding	No	No	No	2
888318	10	2013-04-17 03:12:48	Yes	F61, M80		Feeding	No	No	No	2
888319	10	2013-04-17 03:14:22	Yes	F61, M80		Feeding	No	No	No	2
888320	10	2013-04-17 03:17:28	Yes	F61, M80		Feeding	No	No	No	2
888321	10	2013-04-17 03:19:02	Yes	F61, M80		Feeding	No	No	No	2
888322	10	2013-04-17 03:20:34	Yes	F61, M80		Feeding	No	No	No	2
888323	10	2013-04-17 03:22:04	Yes	F61, M80		Feeding	No	No	No	2
888324	10	2013-04-17 03:23:34	Yes	F61, M80		Feeding	No	No	No	2
888325	10	2013-04-17 03:25:06	Yes	F61, M80		Feeding	No	No	No	2
888326	10	2013-04-17 03:26:38	Yes	F61, F96, M80		Feeding	No	Yes	No	3
888327	10	2013-04-17 03:28:12	Yes	F61, F96, M80		Feeding	No	Yes	No	3
888436	10	2013-04-17 10:59:26	Yes		Magpie	Feeding	No	No	No	1
888437	10	2013-04-17 11:08:14	Yes		Magpie	Feeding	No	No	No	2
888438	10	2013-04-17 11:10:28	Yes		Magpie	Feeding	Yes	No	Yes	3
888439	10	2013-04-17 11:12:30	Yes		Magpie	Feeding	Yes	No	Yes	4
888440	10	2013-04-17 11:14:16	Yes		Magpie	Feeding	Yes	No	Yes	3
888441	10	2013-04-17 11:15:50	Yes		Magpie	Feeding	Yes	No	Yes	4
888442	10	2013-04-17 11:19:04	Yes		Magpie	Feeding	Yes	No	Yes	4
888443	10	2013-04-17 11:20:54	Yes		Magpie	Feeding	Yes	No	Yes	5
888444	10	2013-04-17 11:22:30	Yes		Magpie	Feeding	Yes	No	Yes	5
888445	10	2013-04-17 11:24:14	Yes		Magpie	Feeding	Yes	No	Yes	3
888446	10	2013-04-17 11:28:12	Yes		Magpie	Feeding	No	No	No	2
888447	10	2013-04-17 11:29:46	Yes		Magpie	Feeding	Yes	No	Yes	2
888448	10	2013-04-17 11:33:52	Yes		Magpie	Feeding	Yes	No	Yes	3
888449	10	2013-04-17 11:37:24	Yes		Magpie	Feeding	Yes	No	Yes	2
888450	10	2013-04-17 11:40:36	Yes		Magpie	Feeding	No	No	No	1
888451	10	2013-04-17 11:43:22	Yes		Magpie	Feeding	Yes	No	No	1
888452	10	2013-04-17 11:47:22	Yes		Magpie	Feeding	Yes	No	Yes	2
888453	10	2013-04-17 11:51:42	Yes		Magpie	Feeding	Yes	No	Yes	2
888454	10	2013-04-17 11:54:18	Yes		Magpie	Feeding	Yes	No	Yes	3
888455	10	2013-04-17 11:56:48	Yes		Magpie	Feeding	Yes	No	Yes	2
888456	10	2013-04-17 11:58:26	Yes		Magpie	Feeding	Yes	No	Yes	3
888457	10	2013-04-17 11:59:56	Yes		Magpie	Feeding	Yes	No	Yes	4
888458	10	2013-04-17 12:03:36	Yes		Magpie	Feeding	Yes	No	Yes	4
888459	10	2013-04-17 12:05:16	Yes		Magpie	Feeding	Yes	No	Yes	4
888460	10	2013-04-17 12:11:40	Yes		Magpie	Feeding	No	No	No	2
888461	10	2013-04-17 12:14:22	Yes		Magpie	Nothing	No	No	No	1
888462	10	2013-04-17 12:19:14	No
888490	10	2013-04-17 14:44:36	Yes		Magpie	Feeding	Yes	No	Yes	5
888491	10	2013-04-17 14:46:18	Yes		Magpie	Feeding	Yes	No	Yes	2
888492	10	2013-04-17 14:47:56	Yes		Magpie	Feeding	Yes	No	Yes	3
888493	10	2013-04-17 14:54:16	Yes		Magpie	Feeding	Yes	No	Yes	3
888494	10	2013-04-17 14:57:32	Yes		Magpie	Feeding	No	No	No	1
888495	10	2013-04-17 15:06:12	Yes		Magpie	Feeding	Yes	No	Yes	5
888496	10	2013-04-17 15:09:22	Yes		Magpie	Feeding	Yes	No	Yes	5
888497	10	2013-04-17 15:11:06	Yes		Magpie	Feeding	Yes	No	Yes	2
888498	10	2013-04-17 15:17:52	Yes		Magpie	Feeding	Yes	No	Yes	4
888499	10	2013-04-17 15:22:34	Yes		Vultures	Feeding	No	No	No	2
888500	10	2013-04-17 15:24:06	Yes		Magpie, Vultures	Feeding	No	No	Yes	3
888501	10	2013-04-17 15:26:56	Yes		Magpie	Feeding	Yes	No	Yes	4
888502	10	2013-04-17 15:29:28	Yes		Magpie	Feeding	Yes	No	Yes	2
888503	10	2013-04-17 15:36:26	Yes		Magpie	Feeding	Yes	No	Yes	2
888504	10	2013-04-17 16:27:16	Yes		Magpie	Feeding	Yes	No	Yes	5
888505	10	2013-04-17 16:34:48	Yes		Vultures	Feeding	No	No	No	1
888506	10	2013-04-17 16:38:56	Yes		Vultures	Feeding	No	No	No	1
888507	10	2013-04-17 16:44:28	Yes		Magpie, Vultures	Feeding	No	No	No	2
888508	10	2013-04-17 16:47:24	Yes		Magpie, Vultures	Feeding	No	No	No	2
888509	10	2013-04-17 17:04:06	Yes		Magpie, Vultures	Feeding	No	No	No	3
888510	10	2013-04-17 18:26:28	No							0
888511	10	2013-04-17 18:27:58	Yes	F61		Feeding	No	No	No	1
888512	10	2013-04-17 18:29:30	Yes	F61		Feeding	No	No	No	1
888513	10	2013-04-17 18:31:00	Yes	F61		Feeding	No	No	No	1
888514	10	2013-04-17 18:32:30	Yes	F61		Feeding	No	No	No	1
888515	10	2013-04-17 18:34:10	Yes	F61		Feeding	No	No	No	1
888516	10	2013-04-17 18:35:48	Yes	F61		Feeding	No	No	No	1
888517	10	2013-04-17 18:37:24	Yes	F61		Feeding	No	No	No	1
888518	10	2013-04-17 18:39:10	Yes	F61		Feeding	No	No	No	1
888519	10	2013-04-17 18:40:40	Yes	F61		Caching	No	No	No	1
888520	10	2013-04-17 18:42:14	Yes	F61		Caching	Yes	No	No	1
888521	10	2013-04-17 18:44:34	No							0
888522	10	2013-04-17 19:40:38	Yes		Red fox	Feeding	No	No	No	1
888523	10	2013-04-17 19:42:12	Yes		Red fox	Feeding	No	No	No	1
888524	10	2013-04-17 19:47:42	Yes		Red fox	Feeding	No	No	No	1
888525	10	2013-04-17 19:49:40	Yes		Red fox	Feeding	No	No	No	1
888526	10	2013-04-17 19:53:46	Yes		Red fox	Feeding	No	No	No	1
888527	10	2013-04-17 19:55:20	No							0
888528	10	2013-04-17 20:02:36	Yes	F96		Feeding	No	No	No	1
888529	10	2013-04-17 20:08:30	Yes	F96		Feeding	No	No	No	1
888530	10	2013-04-17 20:10:26	Yes	F96		Feeding	No	No	No	1
888531	10	2013-04-17 20:12:00	Yes	F96		Feeding	No	No	No	1
888532	10	2013-04-17 20:13:42	Yes	F96		Feeding	No	No	No	1
888533	10	2013-04-17 20:15:28	Yes	F96		Feeding	No	No	No	1
888534	10	2013-04-17 20:21:06	Yes	F61, F96		Feeding	No	No	No	2
888535	10	2013-04-17 20:24:42	Yes	F96		Feeding	No	No	No	1
888536	10	2013-04-17 20:26:22	Yes	F96		Feeding	No	No	No	1
888537	10	2013-04-17 20:27:58	Yes	F96		Feeding	No	No	No	1
888538	10	2013-04-17 20:34:36	Yes	F96		Feeding	No	No	No	1
888539	10	2013-04-17 20:36:10	Yes	F96		Feeding	No	No	No	1
888540	10	2013-04-17 20:38:24	Yes	F96		Feeding	No	No	No	1
888541	10	2013-04-17 20:40:00	Yes	F61, F96		Feeding	No	No	No	2
888542	10	2013-04-17 20:43:18	Yes	F96		Feeding	No	No	No	1
888543	10	2013-04-17 20:45:20	Yes	F96		Feeding	No	No	No	1
888544	10	2013-04-17 20:51:58	Yes	F96, M80		Feeding	No	No	No	2
888545	10	2013-04-17 20:55:30	Yes	F61, M80		Feeding	No	No	No	2
888546	10	2013-04-17 20:59:30	Yes	F61, F96, M80		Feeding	No	No	No	3
888547	10	2013-04-17 21:01:12	Yes	F61, M80		Feeding	No	No	No	2
888548	10	2013-04-17 21:03:04	Yes	F61, M80		Feeding	No	No	No	2
888549	10	2013-04-17 21:05:20	Yes	F61, M80		Feeding	No	No	No	2
888550	10	2013-04-17 21:07:22	Yes	F61, M80		Feeding	No	No	No	2
888551	10	2013-04-17 21:09:00	Yes	F61, M80		Feeding	No	No	No	2
888552	10	2013-04-17 21:10:40	Yes	F61, M80		Feeding	No	No	No	2
888553	10	2013-04-17 21:12:16	Yes	F61, M80		Feeding	No	No	No	2
888554	10	2013-04-17 21:13:54	Yes	F61, M80		Feeding	No	No	No	2
888555	10	2013-04-17 21:15:34	Yes	F61, M80		Feeding	No	No	No	2
888556	10	2013-04-17 21:17:08	Yes	F96, M80		Feeding	No	No	No	2
888557	10	2013-04-17 21:19:12	Yes	M80		Feeding	No	No	No	1
888558	10	2013-04-17 21:21:16	Yes	M80		Feeding	No	No	No	1
888559	10	2013-04-17 21:22:52	Yes	M80		Feeding	No	No	No	1
888560	10	2013-04-17 21:25:02	Yes	F96, M80		Feeding	No	Yes	No	2
888561	10	2013-04-17 21:27:10	Yes	M80		Nothing	No	No	No	1
888562	10	2013-04-17 21:43:26	Yes	F61		Resting	No	No	No	1
888563	10	2013-04-17 21:55:02	Yes	F61, M80		Feeding	No	Yes	No	2
888564	10	2013-04-17 21:56:40	Yes	F61, M80		Feeding	No	No	No	2
888565	10	2013-04-17 21:58:14	Yes	F61		Feeding	No	No	No	1
888566	10	2013-04-17 21:59:52	Yes	F61, F96		Feeding	No	No	No	2
888567	10	2013-04-17 22:03:04	Yes	F96		Feeding	No	No	No	1
888568	10	2013-04-17 22:06:36	No							0
888569	10	2013-04-17 22:12:50	Yes	F61		Feeding	No	No	No	1
888570	10	2013-04-17 22:15:18	Yes	F61		Behavior	No	No	No	1
888571	10	2013-04-17 22:53:16	Yes	F61		Behavior	No	No	No	1
888572	10	2013-04-17 22:55:56	Yes	F61		Resting	No	No	No	1
888573	10	2013-04-17 22:57:36	Yes	F61		Resting	No	No	No	1
888574	10	2013-04-18 00:18:34	Yes	F61		Behavior	No	No	No	1
888575	10	2013-04-18 00:20:08	Yes	F61		Behavior	No	No	No	1
888576	10	2013-04-18 00:21:46	Yes	F61		Resting	No	No	No	1
888577	10	2013-04-18 00:23:40	Yes	F61		Feeding	No	No	No	1
888578	10	2013-04-18 00:25:26	Yes	F61		Feeding	No	No	No	1
888579	10	2013-04-18 00:27:16	Yes	F61		Feeding	No	No	No	1
888580	10	2013-04-18 00:28:56	Yes	F61		Feeding	No	No	No	1
888581	10	2013-04-18 00:30:32	Yes	F61		Feeding	No	No	No	1
888582	10	2013-04-18 00:32:06	Yes	F61		Feeding	No	No	No	1
888583	10	2013-04-18 00:33:40	Yes	F61		Feeding	No	No	No	1
888584	10	2013-04-18 00:35:16	Yes	F61		Feeding	No	No	No	1
888585	10	2013-04-18 00:36:50	Yes	F61, M80		Feeding	No	No	No	2
888586	10	2013-04-18 00:38:24	Yes	F61, M80		Feeding	No	No	No	2
888587	10	2013-04-18 00:40:00	Yes	F61		Feeding	No	No	No	1
888588	10	2013-04-18 00:41:34	Yes	F61		Feeding	No	No	No	1
888589	10	2013-04-18 00:43:16	Yes	F61		Feeding	No	No	No	1
888590	10	2013-04-18 00:44:52	Yes	F61, M80		Feeding	No	No	No	2
888591	10	2013-04-18 00:46:26	Yes	M80		Feeding	No	No	No	1
888592	10	2013-04-18 00:48:14	Yes	M80		Feeding	No	No	No	1
888593	10	2013-04-18 00:50:40	Yes	M80		Feeding	No	No	No	1
888594	10	2013-04-18 00:52:54	Yes	M80		Feeding	No	No	No	1
888595	10	2013-04-18 00:54:30	Yes	M80		Feeding	No	No	No	1
888596	10	2013-04-18 00:56:06	Yes	M80		Feeding	No	No	No	1
888597	10	2013-04-18 00:57:44	Yes	M80		Feeding	No	No	No	1
888598	10	2013-04-18 00:59:20	Yes	M80		Feeding	No	No	No	1
888599	10	2013-04-18 01:01:04	Yes	M80		Feeding	No	No	No	1
888600	10	2013-04-18 01:02:40	Yes	M80		Feeding	No	No	No	1
888601	10	2013-04-18 01:04:40	Yes	M80		Feeding	No	No	No	1
888602	10	2013-04-18 01:06:30	Yes	M80		Feeding	No	No	No	1
888603	10	2013-04-18 01:08:06	Yes	M80		Feeding	No	No	No	1
888604	10	2013-04-18 01:09:44	Yes	M80		Feeding	No	No	No	1
888605	10	2013-04-18 01:11:20	Yes	M80		Feeding	No	No	No	1
888606	10	2013-04-18 01:18:44	Yes	F96		Feeding	No	No	No	1
888607	10	2013-04-18 01:20:22	Yes	F96		Feeding	No	No	No	1
888608	10	2013-04-18 01:22:00	Yes	F96		Feeding	No	No	No	1
888609	10	2013-04-18 01:24:16	Yes	F96		Feeding	No	No	No	1
888610	10	2013-04-18 01:29:44	Yes	F96		Feeding	No	No	No	1
888611	10	2013-04-18 01:32:38	Yes	F96		Feeding	No	No	No	1
888612	10	2013-04-18 01:34:16	Yes	F61, F96		Feeding	No	No	No	2
888613	10	2013-04-18 01:35:54	Yes	F61		Feeding	No	No	No	1
888614	10	2013-04-18 01:37:30	Yes	F61		Feeding	No	No	No	1
888615	10	2013-04-18 01:39:10	Yes	F61		Feeding	No	No	No	1
888616	10	2013-04-18 01:40:52	Yes	F61		Feeding	No	No	No	1
888617	10	2013-04-18 01:42:32	Yes	F61		Feeding	No	No	No	1
888618	10	2013-04-18 01:44:08	Yes	F61		Feeding	No	No	No	1
888619	10	2013-04-18 01:46:06	Yes	F61		Feeding	No	No	No	1
888620	10	2013-04-18 01:47:54	Yes	F61		Feeding	No	No	No	1
888621	10	2013-04-18 01:49:34	Yes	F61		Feeding	No	No	No	1
888622	10	2013-04-18 01:51:22	Yes	F61		Feeding	No	No	No	1
888623	10	2013-04-18 01:52:56	Yes	F61		Feeding	No	No	No	1
888624	10	2013-04-18 01:54:34	Yes	F61		Feeding	No	No	No	1
888625	10	2013-04-18 01:56:38	Yes	F61		Feeding	No	No	No	1
888626	10	2013-04-18 01:58:12	Yes	F61		Feeding	No	No	No	1
888627	10	2013-04-18 01:59:52	Yes	F61		Feeding	No	No	No	1
888628	10	2013-04-18 02:01:28	Yes	F61		Feeding	No	No	No	1
888629	10	2013-04-18 02:03:02	Yes	F61		Feeding	No	No	No	1
888630	10	2013-04-18 02:04:46	Yes	F61		Feeding	No	No	No	1
888631	10	2013-04-18 02:06:56	Yes	F61		Feeding	No	No	No	1
888632	10	2013-04-18 02:08:40	Yes	F61		Feeding	No	No	No	1
888633	10	2013-04-18 02:11:12	Yes	M80		Feeding	No	No	No	1
888634	10	2013-04-18 02:14:32	Yes	M80		Feeding	No	No	No	1
888635	10	2013-04-18 02:17:28	Yes	M80		Feeding	No	No	No	1
888636	10	2013-04-18 02:20:20	Yes	M80		Feeding	No	No	No	1
888637	10	2013-04-18 02:22:02	Yes	M80		Feeding	No	No	No	1
888638	10	2013-04-18 02:23:48	Yes	M80		Feeding	No	No	No	1
888639	10	2013-04-18 02:26:06	Yes	M80		Feeding	No	No	No	1
888640	10	2013-04-18 02:27:50	Yes	M80		Feeding	No	No	No	1
888641	10	2013-04-18 02:29:40	Yes	M80		Feeding	No	No	No	1
888642	10	2013-04-18 02:31:20	Yes	M80		Feeding	No	No	No	1
888643	10	2013-04-18 02:33:20	Yes	M80		Feeding	No	No	No	1
888644	10	2013-04-18 03:11:18	Yes	F61		Nothing	No	No	No	1
888645	10	2013-04-18 03:13:04	Yes	F61		Feeding	No	No	No	1
888646	10	2013-04-18 03:14:40	Yes	F61		Feeding	No	No	No	1
888647	10	2013-04-18 03:16:24	Yes	F61		Feeding	No	No	No	1
888648	10	2013-04-18 03:18:08	Yes	F61		Feeding	No	No	No	1
888649	10	2013-04-18 03:19:44	Yes	F61		Feeding	No	No	No	1
888650	10	2013-04-18 03:21:18	Yes	F61		Feeding	No	No	No	1
888651	10	2013-04-18 03:22:58	Yes	F61		Feeding	No	No	No	1
888679	10	2013-04-18 08:41:04	Yes		Magpie, Red fox	Feeding	No	No	No	2
888680	10	2013-04-18 08:42:44	Yes		Magpie, Red fox	Feeding	No	No	No	2
888681	10	2013-04-18 08:44:14	Yes		Red fox	Feeding	No	No	No	1
888682	10	2013-04-18 08:45:42	Yes		Red fox	Feeding	No	No	No	1
888683	10	2013-04-18 08:47:14	Yes		Red fox	Feeding	No	No	No	1
888684	10	2013-04-18 08:48:44	Yes		Red fox	Feeding	No	No	No	1
888685	10	2013-04-18 08:50:14	Yes		Red fox	Feeding	No	No	No	1
888686	10	2013-04-18 08:51:44	Yes		Red fox	Feeding	No	No	No	1
888687	10	2013-04-18 08:53:14	Yes		Red fox	Feeding	No	No	No	1
888688	10	2013-04-18 08:54:46	Yes		Red fox	Feeding	No	No	No	1
888689	10	2013-04-18 08:56:32	Yes		Red fox	Feeding	No	No	No	1
888690	10	2013-04-18 08:58:04	Yes		Red fox	Feeding	No	No	No	1
888691	10	2013-04-18 08:59:40	Yes		Red fox	Feeding	No	No	No	1
888692	10	2013-04-18 09:01:12	Yes		Red fox	Feeding	No	No	No	1
888693	10	2013-04-18 09:02:46	Yes		Red fox	Feeding	No	No	No	1
888694	10	2013-04-18 09:04:16	Yes		Red fox	Feeding	No	No	No	1
888695	10	2013-04-18 09:05:48	Yes		Red fox	Feeding	No	No	No	1
888696	10	2013-04-18 09:07:18	Yes		Red fox	Feeding	No	No	No	1
888697	10	2013-04-18 09:08:50	Yes		Red fox	Feeding	No	No	No	1
888698	10	2013-04-18 09:10:28	Yes		Red fox	Feeding	No	No	No	1
888699	10	2013-04-18 09:12:00	Yes		Red fox	Feeding	No	No	No	1
888700	10	2013-04-18 09:13:34	Yes		Red fox	Feeding	No	No	No	1
888701	10	2013-04-18 09:15:04	Yes		Red fox	Feeding	No	No	No	1
888702	10	2013-04-18 09:16:48	Yes		Red fox	Feeding	No	No	No	1
888703	10	2013-04-18 09:18:18	Yes		Red fox	Feeding	No	No	No	1
888704	10	2013-04-18 09:19:52	Yes		Magpie	Feeding	Yes	No	Yes	3
888705	10	2013-04-18 09:21:22	Yes		Magpie	Feeding	Yes	No	Yes	4
888706	10	2013-04-18 09:23:00	Yes		Magpie	Feeding	Yes	No	Yes	2
888707	10	2013-04-18 09:24:30	Yes		Magpie	Feeding	Yes	No	Yes	2
888708	10	2013-04-18 09:33:02	Yes		Magpie	Feeding	No	No	No	1
888709	10	2013-04-18 09:34:56	Yes		Magpie	Feeding	No	No	No	1
888710	10	2013-04-18 10:10:36	Yes		Magpie	Feeding	Yes	No	Yes	2
888711	10	2013-04-18 10:14:50	Yes		Magpie	Feeding	No	No	No	1
888712	10	2013-04-18 10:39:36	No							0
888713	10	2013-04-18 10:53:52	Yes		Magpie	Feeding	Yes	No	Yes	2
888714	10	2013-04-18 10:55:22	Yes		Magpie	Feeding	Yes	No	Yes	2
888715	10	2013-04-18 10:56:58	Yes		Magpie	Feeding	No	No	No	1
888716	10	2013-04-18 11:02:30	No							0
888717	10	2013-04-18 11:05:40	No							0
888718	10	2013-04-18 11:22:52	Yes		Magpie	Feeding	No	No	No	1
888719	10	2013-04-18 11:34:40	Yes		Magpie	Feeding	No	No	No	1
888720	10	2013-04-18 11:44:26	Yes		Magpie	Feeding	No	No	Yes	2
888721	10	2013-04-18 11:46:26	No							0
888722	10	2013-04-18 11:53:22	Yes		Magpie	Feeding	No	No	No	1
888723	10	2013-04-18 11:59:36	No							0
888724	10	2013-04-18 12:02:02	No							0
888725	10	2013-04-18 12:11:16	Yes		Magpie	Nothing	No	No	No	1
888726	10	2013-04-18 12:38:00	Yes		Magpie	Feeding	Yes	No	Yes	3
888727	10	2013-04-18 12:40:10	Yes		Magpie	Feeding	Yes	No	Yes	3
888728	10	2013-04-18 12:43:24	Yes		Magpie	Feeding	Yes	No	Yes	5
888729	10	2013-04-18 12:52:14	Yes		Magpie	Feeding	Yes	No	Yes	4
888730	10	2013-04-18 12:56:10	Yes		Magpie	Feeding	Yes	No	Yes	6
888731	10	2013-04-18 12:57:50	Yes		Magpie	Feeding	Yes	No	Yes	7
888732	10	2013-04-18 12:59:20	Yes		Magpie	Feeding	Yes	No	Yes	6
888733	10	2013-04-18 13:01:24	Yes		Magpie	Feeding	Yes	No	Yes	4
888734	10	2013-04-18 13:03:04	Yes		Magpie	Feeding	Yes	No	Yes	5
888735	10	2013-04-18 13:04:50	Yes		Magpie	Feeding	Yes	No	Yes	4
888736	10	2013-04-18 13:06:22	Yes		Magpie	Feeding	Yes	No	Yes	6
888737	10	2013-04-18 13:13:02	Yes		Magpie	Feeding	Yes	No	Yes	2
888738	10	2013-04-18 13:14:56	Yes		Magpie	Feeding	Yes	No	Yes	3
888739	10	2013-04-18 13:17:24	Yes		Magpie	Feeding	Yes	No	Yes	2
888740	10	2013-04-18 13:19:04	Yes		Magpie	Feeding	No	No	No	1
888741	10	2013-04-18 13:28:18	Yes		Magpie	Feeding	Yes	No	Yes	4
888742	10	2013-04-18 13:31:50	Yes		Magpie	Feeding	Yes	No	Yes	3
888743	10	2013-04-18 13:33:52	Yes		Magpie	Feeding	Yes	No	No	1
888744	10	2013-04-18 13:39:16	Yes		Magpie	Feeding	Yes	No	Yes	7
888745	10	2013-04-18 13:41:24	Yes		Magpie	Feeding	Yes	No	Yes	6
888746	10	2013-04-18 13:45:12	Yes		Magpie	Feeding	Yes	No	Yes	4
888747	10	2013-04-18 13:47:26	Yes		Magpie	Feeding	Yes	No	Yes	1
888748	10	2013-04-18 13:56:20	Yes		Magpie	Feeding	No	No	No	2
888749	10	2013-04-18 14:16:10	Yes		Magpie	Feeding	Yes	No	Yes	9
888750	10	2013-04-18 14:17:46	Yes		Magpie	Feeding	No	No	No	1
888751	10	2013-04-18 15:13:16	Yes		Magpie	Feeding	Yes	No	Yes	4
888752	10	2013-04-18 18:45:42	Yes		Red fox	Nothing	No	No	No	1
888753	10	2013-04-18 18:47:22	Yes		Red fox	Feeding	No	No	No	1
888754	10	2013-04-18 18:49:26	Yes		Red fox	Feeding	No	No	No	1
888755	10	2013-04-18 18:51:10	Yes		Red fox	Feeding	No	No	No	1
888756	10	2013-04-18 18:53:30	Yes		Red fox	Feeding	No	No	No	1
888757	10	2013-04-18 19:00:42	Yes		Red fox	Feeding	No	No	No	1
888758	10	2013-04-18 19:02:18	Yes		Red fox	Feeding	No	No	No	1
888759	10	2013-04-18 19:04:04	Yes		Red fox	Feeding	No	No	No	1
888760	10	2013-04-18 19:05:46	Yes		Red fox	Feeding	No	No	No	1
888761	10	2013-04-18 19:07:44	Yes		Red fox	Feeding	No	No	No	1
888762	10	2013-04-18 20:07:56	Yes		Red fox	Feeding	No	No	No	1
888763	10	2013-04-18 20:18:40	Yes		Red fox	Feeding	No	No	No	1
888764	10	2013-04-18 20:20:38	Yes		Red fox	Feeding	No	No	No	1
888765	10	2013-04-18 20:22:16	Yes		Red fox	Feeding	No	No	No	1
888766	10	2013-04-18 20:23:48	Yes		Red fox	Feeding	No	No	No	1
888767	10	2013-04-18 20:25:24	Yes		Red fox	Feeding	No	No	No	1
888768	10	2013-04-18 20:26:56	Yes		Red fox	Feeding	No	No	No	1
888769	10	2013-04-18 20:28:30	Yes		Red fox	Feeding	No	No	No	1
888770	10	2013-04-18 20:41:48	Yes	F61		Feeding	No	No	No	1
888771	10	2013-04-18 20:43:32	Yes	F61		Feeding	No	No	No	1
888772	10	2013-04-18 20:45:02	Yes	F61, F96		Feeding	No	Yes	No	2
888773	10	2013-04-18 20:46:34	Yes	F61		Feeding	No	No	No	1
888774	10	2013-04-18 20:48:04	Yes	F61, F96, M80		Feeding	No	No	No	3
888775	10	2013-04-18 20:49:32	Yes	F61, F96, M80		Feeding	No	No	No	3
888776	10	2013-04-18 20:51:24	Yes	F96, M80		Feeding	No	No	No	2
888777	10	2013-04-18 20:54:28	Yes	F61, F96, M80		Feeding	No	No	No	3
888778	10	2013-04-18 20:56:50	Yes	F96, M80		Feeding	No	No	No	2
888779	10	2013-04-18 20:59:28	Yes	F61, F96, M80		Feeding	No	No	No	3
888780	10	2013-04-18 21:01:14	Yes	F61, F96, M80		Feeding	No	No	No	3
888781	10	2013-04-18 21:02:44	Yes	F61, F96, M80		Feeding	No	No	No	3
888782	10	2013-04-18 21:04:14	Yes	F61, F96, M80		Feeding	No	No	No	3
888783	10	2013-04-18 21:06:00	Yes	F61, F96, M80		Feeding	No	No	No	3
888784	10	2013-04-18 21:07:30	Yes	F61, F96, M80		Feeding	No	No	No	3
888785	10	2013-04-18 21:09:14	Yes	F61, F96, M80		Feeding	Yes	Yes	No	3	M80 tries to drag carcass
888786	10	2013-04-18 21:10:48	Yes	F61, F96, M80		Feeding	No	Yes	No	3
888814	10	2013-04-18 22:55:12	Yes	F61, F96, M80		Feeding	No	No	No	3
888815	10	2013-04-18 23:00:28	Yes	F61, F96, M80		Feeding	No	No	No	3
888816	10	2013-04-18 23:02:02	Yes	F61, F96, M80		Feeding	No	No	No	3
888817	10	2013-04-18 23:04:10	Yes	F61, F96, M80		Feeding	No	No	No	3
888818	10	2013-04-18 23:09:24	Yes	F61, F96, M80		Feeding	No	No	No	3
888819	10	2013-04-18 23:15:48	Yes	F61, F96, M80		Feeding	No	No	No	3
888820	10	2013-04-18 23:17:18	Yes	F61, F96, M80		Feeding	No	No	No	3
888821	10	2013-04-18 23:19:56	Yes	F61, F96, M80		Feeding	No	No	No	3
888822	10	2013-04-18 23:21:28	Yes	F61, F96, M80		Feeding	No	No	No	3
888823	10	2013-04-18 23:23:20	Yes	F61, F96, M80		Feeding	No	No	No	3
888824	10	2013-04-18 23:26:36	Yes	F61, F96, M80		Feeding	No	No	No	3
888825	10	2013-04-18 23:30:22	Yes	F61, F96, M80		Feeding	No	No	No	3
888826	10	2013-04-18 23:32:48	Yes	F61, F96, M80		Feeding	No	No	No	3
888827	10	2013-04-18 23:42:46	Yes	F61, F96, M80		Feeding	No	No	No	3
888828	10	2013-04-18 23:44:34	Yes	F61, F96, M80		Feeding	No	No	No	3
888829	10	2013-04-18 23:57:40	Yes	F61, F96, M80		Feeding	No	No	No	3
888830	10	2013-04-19 00:00:36	Yes	F61, F96, M80		Feeding	No	No	No	3
888831	10	2013-04-19 00:02:44	Yes	F61, F96, M80		Feeding	No	No	No	3
888832	10	2013-04-19 00:07:04	Yes	F61, F96, M80		Feeding	No	No	No	3
888833	10	2013-04-19 00:13:54	Yes	F61, F96, M80		Feeding	No	No	No	3
888834	10	2013-04-19 00:21:00	Yes	F61, F96, M80		Feeding	No	No	No	3
888835	10	2013-04-19 00:24:04	Yes	F61, F96, M80		Feeding	No	No	No	3
888836	10	2013-04-19 00:25:44	Yes	F61, F96, M80		Feeding	No	No	No	3
888837	10	2013-04-19 00:46:34	Yes	F61, F96, M80		Feeding	No	No	No	3
888838	10	2013-04-19 00:48:12	Yes	F61, F96, M80		Playing	No	No	No	3
888839	10	2013-04-19 00:49:48	Yes	F61, F96, M80		Nothing	No	No	No	3
888840	10	2013-04-19 00:51:18	Yes	F61, F96, M80		Nothing	No	No	No	3
888841	10	2013-04-19 00:52:56	Yes	F61, F96		Resting	No	No	No	2
888842	10	2013-04-19 00:55:38	Yes	F61, F96, M80		Nothing	No	No	No	3
888843	10	2013-04-19 00:59:22	Yes	F61, F96		Feeding	No	No	No	2
888844	10	2013-04-19 01:03:50	Yes	F61, F96, M80		Feeding	No	No	No	3
888845	10	2013-04-19 01:06:18	Yes	F61, F96, M80		Feeding	No	No	No	3
888846	10	2013-04-19 01:10:52	Yes	F61, F96, M80		Resting	No	No	No	3
888847	10	2013-04-19 01:12:44	Yes	F61, F96		Resting	No	No	No	2
888848	10	2013-04-19 01:16:10	Yes	F61, F96, M80		Feeding	No	No	No	3
888849	10	2013-04-19 01:18:24	Yes	F61, F96, M80		Feeding	No	No	No	3
888850	10	2013-04-19 01:21:40	Yes	F61, F96, M80		Feeding	No	No	No	3
888851	10	2013-04-19 01:27:52	Yes	F61, F96, M80		Feeding	No	No	No	3
888852	10	2013-04-19 01:31:04	Yes	F61, F96, M80		Feeding	No	No	No	3
888853	10	2013-04-19 01:37:00	Yes	F61, F96, M80		Feeding	No	No	No	3
888854	10	2013-04-19 01:42:24	Yes	F61, F96, M80		Feeding	No	No	No	3
888855	10	2013-04-19 01:54:22	Yes	F61		Nothing	No	No	No	1
888856	10	2013-04-19 01:57:48	Yes	F61		Feeding	No	No	No	1
888857	10	2013-04-19 02:00:50	Yes	F61		Feeding	No	No	No	1
888858	10	2013-04-19 02:02:28	Yes	F61		Feeding	No	No	No	1
888859	10	2013-04-19 02:05:52	Yes	F61		Feeding	No	No	No	1
888860	10	2013-04-19 02:07:50	Yes	F61		Nothing	No	No	No	1
888861	10	2013-04-19 02:09:30	Yes	F61, M80		Feeding	No	No	No	2
888862	10	2013-04-19 02:11:12	Yes	F61, M80		Feeding	No	No	No	2
888863	10	2013-04-19 02:13:06	Yes	F61, M80		Feeding	No	No	No	2
888864	10	2013-04-19 02:17:28	Yes	F61, F96, M80		Feeding	No	No	No	3
888865	10	2013-04-19 02:19:40	Yes	F61, F96, M80		Feeding	No	No	No	3
888866	10	2013-04-19 02:21:30	Yes	F61, F96, M80		Feeding	No	No	No	3
888867	10	2013-04-19 02:28:32	Yes	F61, M80		Feeding	No	No	No	2
888868	10	2013-04-19 02:32:44	Yes	F61, F96, M80		Feeding	No	No	No	3
888869	10	2013-04-19 02:34:20	Yes	F61, F96, M80		Feeding	No	No	No	3
888870	10	2013-04-19 02:36:46	Yes	F61, F96, M80		Feeding	No	No	No	3
888871	10	2013-04-19 02:39:24	Yes	F61, F96, M80		Feeding	No	No	No	3
888872	10	2013-04-19 02:42:12	Yes	M80		Feeding	No	No	No	1
888873	10	2013-04-19 02:43:42	Yes	F61		Feeding	No	No	No	1
888874	10	2013-04-19 02:58:44	Yes		Red fox	Feeding	No	No	No	1
888875	10	2013-04-19 03:32:24	Yes		Red fox	Feeding	No	No	No	1
888876	10	2013-04-19 03:40:34	Yes		Red fox	Feeding	No	No	No	1
888877	10	2013-04-19 03:49:44	Yes		Red fox	Feeding	No	No	No	1
888878	10	2013-04-19 04:08:58	Yes		Red fox	Feeding	No	No	No	1
888879	10	2013-04-19 04:14:04	No							0
888880	10	2013-04-19 04:18:32	Yes		Red fox	Feeding	No	No	No	1
888881	10	2013-04-19 04:22:30	Yes		Red fox	Feeding	No	No	No	1
888882	10	2013-04-19 04:27:46	Yes		Red fox	Feeding	No	No	No	1
888883	10	2013-04-19 04:42:02	Yes		Red fox	Nothing	No	No	No	1
888884	10	2013-04-19 13:37:40	Yes		Magpie	Feeding	No	No	No	2
888885	10	2013-04-19 13:47:32	No							0
888886	10	2013-04-19 13:49:04	No							0
888887	10	2013-04-19 13:53:44	No							0
888888	10	2013-04-19 13:56:04	No							0
888889	10	2013-04-19 13:57:34	No							0
866192	10	2013-04-16 12:00:06	No							0
866193	10	2013-04-16 12:02:20	No							0
866194	10	2013-04-16 12:04:56	No							0
866195	10	2013-04-16 12:08:50	No							0
866196	10	2013-04-16 12:11:16	No							0
866197	10	2013-04-16 12:13:42	No							0
866198	10	2013-04-16 12:18:06	No							0
866199	10	2013-04-16 12:21:24	No							0
866200	10	2013-04-16 12:23:52	No							0
866201	10	2013-04-16 12:26:02	No							0
866202	10	2013-04-16 12:28:12	No							0
866203	10	2013-04-16 12:30:22	No							0
866204	10	2013-04-16 12:32:44	No							0
866205	10	2013-04-16 12:35:34	No							0
866206	10	2013-04-16 12:38:38	No							0
866207	10	2013-04-16 12:41:16	No							0
866208	10	2013-04-16 12:43:34	No							0
866209	10	2013-04-16 12:46:06	No							0
866210	10	2013-04-16 12:48:42	No							0
866211	10	2013-04-16 12:50:52	No							0
866212	10	2013-04-16 12:53:04	No							0
866213	10	2013-04-16 12:55:36	No							0
866214	10	2013-04-16 12:58:00	No							0
866215	10	2013-04-16 13:01:36	No							0
866216	10	2013-04-16 13:04:22	No							0
888390	10	2013-04-17 05:42:42	Yes	F61		Caching	Yes	No	No	1
888391	10	2013-04-17 05:44:18	Yes	F61		Nothing	No	No	No	1
888392	10	2013-04-17 06:06:36	Yes		Magpie	Feeding	No	No	No	1
888393	10	2013-04-17 06:11:04	Yes		Magpie	Feeding	No	No	No	1
888394	10	2013-04-17 07:21:18	Yes		Magpie	Feeding	No	No	No	2
888395	10	2013-04-17 07:23:30	Yes		Magpie	Feeding	No	No	No	2
888396	10	2013-04-17 07:25:32	Yes		Magpie	Feeding	No	No	No	1
888397	10	2013-04-17 07:27:46	Yes		Magpie	Feeding	Yes	No	Yes	2
888398	10	2013-04-17 07:29:32	Yes		Magpie	Feeding	No	No	No	3
888399	10	2013-04-17 07:31:04	Yes		Magpie	Feeding	Yes	No	Yes	5
888400	10	2013-04-17 07:32:56	Yes		Magpie	Feeding	Yes	No	Yes	5
888401	10	2013-04-17 07:35:32	Yes		Magpie	Feeding	Yes	No	Yes	5
888402	10	2013-04-17 07:40:12	Yes		Magpie	Feeding	Yes	No	Yes	5
888403	10	2013-04-17 07:45:10	Yes		Magpie	Feeding	Yes	No	Yes	2
888404	10	2013-04-17 07:49:42	Yes		Magpie	Feeding	Yes	No	Yes	5
888405	10	2013-04-17 07:54:50	Yes		Magpie	Feeding	Yes	No	Yes	3
888406	10	2013-04-17 08:03:02	Yes		Magpie	Feeding	Yes	No	Yes	2
888407	10	2013-04-17 08:04:52	Yes		Magpie	Feeding	Yes	No	Yes	2
888408	10	2013-04-17 08:08:02	Yes		Magpie	Feeding	No	No	No	1
888409	10	2013-04-17 08:09:38	Yes		Magpie	Feeding	No	No	No	1
888410	10	2013-04-17 08:47:08	Yes		Magpie	Feeding	No	No	No	1
888411	10	2013-04-17 08:49:20	Yes		Magpie	Feeding	No	No	No	1
888412	10	2013-04-17 08:52:28	Yes		Magpie	Feeding	No	No	No	1
888413	10	2013-04-17 09:01:50	Yes		Magpie	Feeding	Yes	No	Yes	9
888414	10	2013-04-17 09:03:20	Yes		Magpie	Feeding	Yes	No	Yes	9
888415	10	2013-04-17 09:06:46	Yes		Magpie	Feeding	Yes	No	Yes	2
888204	10	2013-04-16 17:09:20	Yes	F61		Feeding	No	No	No	1
888205	10	2013-04-16 17:10:58	Yes	F61		Feeding	No	No	No	1
888206	10	2013-04-16 17:13:16	Yes	F61		Feeding	No	No	No	1
888207	10	2013-04-16 17:14:46	Yes	F61		Feeding	No	No	No	1
888208	10	2013-04-16 17:16:16	Yes	F61		Caching	No	No	No	1
888209	10	2013-04-16 17:17:46	Yes	F61		Caching	No	No	No	1
888210	10	2013-04-16 17:19:16	Yes	F61		Caching	No	No	No	1
888211	10	2013-04-16 17:20:44	Yes	F61		Caching	No	No	No	1
888212	10	2013-04-16 19:30:04	Yes	F61		Feeding	Yes	No	No	1
888213	10	2013-04-16 19:31:32	Yes	F61		Feeding	No	No	No	1
888214	10	2013-04-16 19:35:42	Yes	F61		Feeding	No	No	No	1
888215	10	2013-04-16 19:38:32	Yes	F61		Feeding	No	No	No	1
888216	10	2013-04-16 19:40:44	Yes	F61		Feeding	Yes	No	No	1
888217	10	2013-04-16 19:46:38	Yes	F96		Feeding	No	No	No	1
888218	10	2013-04-16 19:48:08	Yes	F96		Feeding	No	No	No	1
888219	10	2013-04-16 19:50:48	Yes	F96		Feeding	No	No	No	1
888355	10	2013-04-17 04:22:48	Yes	F96		Feeding	No	No	No	1
888356	10	2013-04-17 04:24:42	Yes	F96		Feeding	No	No	No	1
888357	10	2013-04-17 04:27:14	Yes	F96		Feeding	No	No	No	1
888358	10	2013-04-17 04:29:14	Yes	F96		Feeding	No	No	No	1
888359	10	2013-04-17 04:30:46	Yes	F96		Feeding	No	No	No	1
888360	10	2013-04-17 04:32:32	Yes	F96		Feeding	No	No	No	1
888361	10	2013-04-17 04:34:04	Yes	F96		Feeding	No	No	No	1
888362	10	2013-04-17 04:36:40	Yes	F96		Feeding	No	No	No	1
888363	10	2013-04-17 04:38:18	Yes	F96		Feeding	No	No	No	1
888364	10	2013-04-17 04:40:34	Yes	F96		Feeding	No	No	No	1
888365	10	2013-04-17 04:43:40	Yes	F96		Feeding	No	No	No	1
888366	10	2013-04-17 04:46:06	Yes	F96		Feeding	No	No	No	1
888367	10	2013-04-17 04:49:06	Yes	F96		Feeding	No	No	No	1
888368	10	2013-04-17 04:50:52	Yes	F96		Feeding	No	No	No	1
888369	10	2013-04-17 04:52:50	Yes	F96		Feeding	No	No	No	1
888370	10	2013-04-17 04:55:42	Yes	F96		Feeding	No	No	No	1
888371	10	2013-04-17 04:57:34	Yes	F96		Feeding	No	No	No	1
888372	10	2013-04-17 04:59:04	Yes	F96		Feeding	No	No	No	1
888373	10	2013-04-17 05:01:14	Yes	F61		Feeding	No	No	No	1
888374	10	2013-04-17 05:02:48	Yes	F61		Feeding	No	No	No	1
888375	10	2013-04-17 05:04:20	Yes	F61		Caching	No	No	No	1
888376	10	2013-04-17 05:05:54	Yes	F61		Caching	No	No	No	1
888377	10	2013-04-17 05:07:26	Yes	F61		Caching	No	No	No	1
888378	10	2013-04-17 05:09:00	Yes	F61		Caching	No	No	No	1
888379	10	2013-04-17 05:10:32	Yes	F61, M80		Caching	No	No	No	2
888380	10	2013-04-17 05:12:04	Yes	M80		Feeding	No	No	No	1
888381	10	2013-04-17 05:28:38	Yes	F61		Feeding	No	No	No	1
888382	10	2013-04-17 05:30:10	Yes	F61		Feeding	No	No	No	1
888383	10	2013-04-17 05:31:46	Yes	F61		Feeding	No	No	No	1
888384	10	2013-04-17 05:33:20	Yes	F61		Feeding	No	No	No	1
888385	10	2013-04-17 05:34:52	Yes	F61		Feeding	No	No	No	1
888386	10	2013-04-17 05:36:28	Yes	F61		Feeding	No	No	No	1
888387	10	2013-04-17 05:38:00	Yes	F61		Feeding	No	No	No	1
888388	10	2013-04-17 05:39:30	Yes	F61		Feeding	No	No	No	1
888389	10	2013-04-17 05:41:02	Yes	F61		Feeding	No	No	No	1
888416	10	2013-04-17 09:10:14	Yes		Magpie	Nothing	No	No	No	1
888417	10	2013-04-17 09:12:38	No							0
888418	10	2013-04-17 09:29:26	Yes		Magpie	Feeding	No	No	Yes	2
888419	10	2013-04-17 09:31:08	Yes		Magpie	Feeding	Yes	No	No	2
888420	10	2013-04-17 09:54:34	Yes		Magpie, Red fox	Feeding	Yes	No	Yes	2
888421	10	2013-04-17 09:56:06	Yes		Magpie, Red fox	Feeding	No	No	No	2
888422	10	2013-04-17 09:57:36	Yes		Red fox	Feeding	No	No	No	1
888423	10	2013-04-17 09:59:08	Yes		Magpie, Red fox	Feeding	No	No	No	2
888424	10	2013-04-17 10:00:40	Yes		Magpie, Red fox	Feeding	No	No	No	2
888425	10	2013-04-17 10:02:14	Yes		Magpie, Red fox	Feeding	No	No	No	2
888426	10	2013-04-17 10:12:40	Yes		Magpie	Feeding	Yes	No	Yes	3
888427	10	2013-04-17 10:15:06	Yes		Magpie	Feeding	Yes	No	Yes	3
888428	10	2013-04-17 10:16:40	Yes		Magpie	Feeding	Yes	No	Yes	3
888429	10	2013-04-17 10:18:20	Yes		Magpie	Feeding	Yes	No	Yes	2
888430	10	2013-04-17 10:22:22	Yes		Magpie	Feeding	Yes	No	Yes	2
888431	10	2013-04-17 10:23:56	Yes		Magpie	Feeding	Yes	No	Yes	5
888432	10	2013-04-17 10:25:30	Yes		Magpie	Feeding	Yes	No	Yes	3
888433	10	2013-04-17 10:32:16	Yes		Magpie	Feeding	No	No	No	1
888434	10	2013-04-17 10:34:52	Yes		Magpie	Feeding	No	No	No	1
888435	10	2013-04-17 10:51:48	Yes		Magpie	Feeding	No	No	No	1
888463	10	2013-04-17 12:20:54	Yes		Magpie	Feeding	Yes	No	No	1
888464	10	2013-04-17 12:23:02	Yes		Magpie	Feeding	No	No	No	1
888465	10	2013-04-17 12:26:20	Yes		Magpie	Feeding	Yes	No	Yes	3
888466	10	2013-04-17 12:28:40	Yes		Magpie	Feeding	Yes	No	Yes	3
888467	10	2013-04-17 12:31:42	Yes		Magpie	Feeding	No	No	No	1
888468	10	2013-04-17 12:37:16	Yes		Magpie	Feeding	No	No	No	1
888469	10	2013-04-17 12:43:14	Yes		Magpie	Feeding	Yes	No	No	1
888470	10	2013-04-17 12:45:58	Yes		Magpie	Feeding	No	No	No	1
888471	10	2013-04-17 12:49:36	Yes		Magpie	Feeding	Yes	No	No	1
888472	10	2013-04-17 12:51:12	Yes		Magpie	Feeding	Yes	No	No	1
888473	10	2013-04-17 12:53:28	No
888474	10	2013-04-17 12:56:06	No
888475	10	2013-04-17 13:07:28	Yes		Magpie	Feeding	No	No	No	1
888476	10	2013-04-17 13:11:28	Yes		Magpie	Feeding	Yes	No	Yes	2
888477	10	2013-04-17 13:16:20	No
888478	10	2013-04-17 13:22:30	Yes		Magpie	Feeding	Yes	No	Yes	2
888479	10	2013-04-17 13:26:08	Yes		Magpie	Feeding	No	No	No	1
888480	10	2013-04-17 13:53:36	No
888481	10	2013-04-17 13:58:28	Yes		Magpie	Feeding	Yes	No	Yes	3
888482	10	2013-04-17 14:01:24	Yes		Magpie	Feeding	Yes	No	Yes	5
888483	10	2013-04-17 14:04:06	Yes		Magpie	Feeding	Yes	No	Yes	6
888484	10	2013-04-17 14:05:40	Yes		Magpie	Feeding	Yes	No	Yes	2
888485	10	2013-04-17 14:28:16	Yes		Magpie	Feeding	No	No	No	1
888486	10	2013-04-17 14:29:52	Yes		Magpie	Feeding	Yes	No	Yes	4
888487	10	2013-04-17 14:31:28	Yes		Magpie	Feeding	Yes	No	Yes	3
888488	10	2013-04-17 14:33:02	Yes		Magpie	Feeding	Yes	No	Yes	6
888489	10	2013-04-17 14:37:20	Yes		Magpie	Feeding	Yes	No	Yes	5
888652	10	2013-04-18 03:24:32	Yes	F61		Feeding	No	No	No	1
888653	10	2013-04-18 03:26:24	Yes	F61		Feeding	No	No	No	1
888654	10	2013-04-18 03:28:00	Yes	F61		Feeding	No	No	No	1
888655	10	2013-04-18 03:29:34	Yes	F61		Feeding	No	No	No	1
888656	10	2013-04-18 03:31:20	Yes	M80		Feeding	No	No	No	1
888657	10	2013-04-18 03:33:10	Yes	M80		Feeding	No	No	No	1
888658	10	2013-04-18 03:35:04	Yes	M80		Feeding	No	No	No	1
888659	10	2013-04-18 03:38:44	Yes	M80		Feeding	No	No	No	1
888660	10	2013-04-18 03:41:08	Yes	M80		Feeding	No	No	No	1
888661	10	2013-04-18 03:42:44	Yes	M80		Feeding	No	No	No	1
888662	10	2013-04-18 03:44:22	Yes	M80		Feeding	No	No	No	1
888663	10	2013-04-18 03:46:48	Yes	M80		Feeding	No	No	No	1
888664	10	2013-04-18 03:48:30	Yes	M80		Feeding	No	No	No	1
888665	10	2013-04-18 03:50:30	Yes	M80		Feeding	No	No	No	1
888666	10	2013-04-18 04:03:14	Yes	F61		Feeding	No	No	No	1
888667	10	2013-04-18 04:05:02	Yes	F61		Nothing	No	No	No	1
888668	10	2013-04-18 04:06:38	Yes	F61		Feeding	No	No	No	1
888669	10	2013-04-18 04:08:16	Yes	F61		Caching	No	No	No	1
888670	10	2013-04-18 05:33:34	Yes		Magpie	Feeding	Yes	No	Yes	5
888671	10	2013-04-18 05:35:30	Yes		Magpie	Feeding	Yes	No	Yes	6
888672	10	2013-04-18 05:38:54	Yes		Magpie	Feeding	Yes	No	Yes	6
888673	10	2013-04-18 05:41:04	Yes		Magpie	Feeding	Yes	No	Yes	4
888674	10	2013-04-18 08:33:10	Yes		Red fox	Feeding	No	No	No	1
888675	10	2013-04-18 08:34:42	Yes		Red fox	Feeding	No	No	No	1
888676	10	2013-04-18 08:36:16	Yes		Red fox	Feeding	No	No	No	1
888677	10	2013-04-18 08:37:50	Yes		Red fox	Feeding	No	No	No	1
888678	10	2013-04-18 08:39:28	Yes		Red fox	Feeding	No	No	No	1
888787	10	2013-04-18 21:12:24	Yes	F61, F96, M80		Feeding	No	No	No	3
888788	10	2013-04-18 21:14:46	Yes	F61, F96, M80		Feeding	No	No	No	3
888789	10	2013-04-18 21:16:16	Yes	F61, F96, M80		Feeding	No	No	No	3
888790	10	2013-04-18 21:17:48	Yes	F61, F96, M80		Feeding	No	No	No	3
888791	10	2013-04-18 21:19:24	Yes	F61, F96		Feeding	No	No	No	2
888792	10	2013-04-18 21:22:48	Yes	F61, F96		Feeding	No	No	No	2
888793	10	2013-04-18 21:24:48	Yes	F61, F96		Feeding	No	No	No	2
888794	10	2013-04-18 21:33:20	Yes	F61, F96, M80		Cleaning	No	No	No	3
888795	10	2013-04-18 21:37:36	Yes	F61, M80		Feeding	No	No	No	2
888796	10	2013-04-18 21:39:26	Yes	F61, F96, M80		Feeding	No	No	No	3
888797	10	2013-04-18 21:41:28	Yes	F61, F96, M80		Feeding	No	No	No	3
888798	10	2013-04-18 21:49:14	Yes	F61, F96, M80		Feeding	No	No	No	3
888799	10	2013-04-18 21:51:08	Yes	F61, F96, M80		Feeding	No	No	No	3
888800	10	2013-04-18 22:02:02	Yes	F61, F96, M80		Feeding	No	No	No	3
888801	10	2013-04-18 22:17:18	Yes	F61, F96, M80		Feeding	No	No	No	3
888802	10	2013-04-18 22:21:28	Yes	F61, F96, M80		Feeding	No	No	No	3
888803	10	2013-04-18 22:23:06	Yes	F61, F96, M80		Feeding	No	No	No	3
888804	10	2013-04-18 22:26:12	Yes	F61, F96, M80		Feeding	No	No	No	3
888805	10	2013-04-18 22:33:36	Yes	F61, F96, M80		Feeding	No	No	No	3
888806	10	2013-04-18 22:36:30	Yes	F61, F96, M80		Feeding	No	No	No	3
888807	10	2013-04-18 22:38:08	Yes	F61, F96, M80		Feeding	No	No	No	3
888808	10	2013-04-18 22:43:14	Yes	F61, F96, M80		Feeding	No	No	No	3
888809	10	2013-04-18 22:44:48	Yes	F61, F96, M80		Feeding	No	No	No	3
888810	10	2013-04-18 22:46:54	Yes	F61, F96, M80		Feeding	No	No	No	3
888811	10	2013-04-18 22:48:28	Yes	F61, F96, M80		Feeding	No	No	No	3
888812	10	2013-04-18 22:51:32	Yes	F61, F96, M80		Feeding	No	No	No	3
888813	10	2013-04-18 22:53:28	Yes	F61, F96, M80		Feeding	No	No	No	3
4630899	1000	2014-05-28 06:30:02	Yes		Magpie	Feeding	No	No	No	1
4630900	1000	2014-05-28 06:31:40	No							0
4630901	1000	2014-05-28 07:08:48	Yes		Magpie, Red squirrel	Feeding	Yes	No	No	2
4630902	1000	2014-05-28 11:28:12	No							0
4630903	1000	2014-05-28 11:35:24	No							0
4630904	1000	2014-05-28 11:40:16	No							0
4630905	1000	2014-05-28 11:44:40	No							0
4630906	1000	2014-05-28 11:46:46	No							0
4630907	1000	2014-05-28 11:50:30	No							0
4630908	1000	2014-05-28 12:02:58	No							0
4630909	1000	2014-05-28 12:06:08	No							0
4630910	1000	2014-05-28 12:07:38	No							0
4630911	1000	2014-05-28 12:11:32	Yes		Magpie	Feeding	No	No	No	1
4630912	1000	2014-05-28 12:13:40	Yes		Magpie	Nothing	No	No	No	1
4630913	1000	2014-05-28 12:17:04	No							0
4630914	1000	2014-05-28 12:22:20	No							0
4630915	1000	2014-05-28 12:24:26	No							0
4630916	1000	2014-05-28 12:27:38	No							0
4630917	1000	2014-05-28 12:31:18	No							0
4630918	1000	2014-05-28 12:34:46	No							0
4630919	1000	2014-05-28 12:40:14	No							0
4630920	1000	2014-05-28 12:42:06	No							0
4630921	1000	2014-05-28 12:43:38	No							0
4630922	1000	2014-05-28 12:47:26	No							0
4630923	1000	2014-05-28 12:50:12	No							0
4630924	1000	2014-05-28 12:52:04	No							0
4630925	1000	2014-05-28 12:55:38	No							0
4630926	1000	2014-05-28 12:57:14	No							0
4630927	1000	2014-05-28 13:00:10	No							0
4631153	1000	2014-05-29 14:43:30	No							0
4631154	1000	2014-05-29 14:47:08	No							0
4631155	1000	2014-05-29 14:49:56	No							0
4631209	1000	2014-05-30 11:02:58	Yes		Magpie	Feeding	Yes	No	Yes	1	magpies chattering offscreen
4631156	1000	2014-05-29 14:53:14	No							0
4631157	1000	2014-05-29 14:55:04	No							0
4631158	1000	2014-05-29 15:00:58	No							0
4631159	1000	2014-05-29 15:03:34	No							0
4631160	1000	2014-05-29 15:05:04	No							0
4631161	1000	2014-05-29 15:09:52	Yes		Magpie	Feeding	No	No	No	1
4631162	1000	2014-05-29 15:11:38	Yes		Magpie	Feeding	No	No	No	1
4631163	1000	2014-05-29 15:13:50	Yes		Magpie	Feeding	No	No	No	1
4631164	1000	2014-05-29 15:15:30	Yes		Magpie	Feeding	No	No	No	1
4631165	1000	2014-05-29 15:17:02	No							0
4631166	1000	2014-05-29 15:18:34	No							0
4631167	1000	2014-05-29 15:20:42	No							0
4631168	1000	2014-05-29 15:23:00	No							0
4631169	1000	2014-05-29 15:25:10	No							0
4631170	1000	2014-05-29 15:27:30	No							0
4631171	1000	2014-05-29 15:32:28	No							0
4631172	1000	2014-05-29 15:34:02	No							0
4631173	1000	2014-05-29 15:35:52	No							0
4631174	1000	2014-05-29 15:46:44	No							0
4631175	1000	2014-05-29 16:01:48	No							0
4631176	1000	2014-05-29 16:55:52	Yes		Magpie	Feeding	No	No	No	1
4631177	1000	2014-05-29 17:03:18	Yes		Magpie	Feeding	No	No	No	1
4631178	1000	2014-05-29 17:22:52	Yes		Magpie	Feeding	No	No	No	1
4631179	1000	2014-05-29 17:25:10	Yes		Magpie	Feeding	No	No	No	1
4631180	1000	2014-05-29 18:41:28	Yes		Magpie	Feeding	No	No	No	1
4631181	1000	2014-05-29 19:06:00	Yes		Magpie	Feeding	No	No	No	1
4631182	1000	2014-05-29 19:17:58	Yes		Magpie	Feeding	No	No	No	1
4631183	1000	2014-05-29 19:51:58	Yes		Magpie	Feeding	No	No	No	1
4631184	1000	2014-05-29 19:56:48	Yes		Magpie	Feeding	No	No	No	1
4631185	1000	2014-05-29 21:40:10	Yes	F61		Feeding	No	No	No	1
4631186	1000	2014-05-29 21:41:46	Yes	F61		Feeding	No	No	No	1
4631187	1000	2014-05-29 21:44:16	Yes	F61		Feeding	No	No	No	1
4631188	1000	2014-05-29 21:47:12	Yes	F61		Feeding	No	No	No	1
4631189	1000	2014-05-29 21:48:42	Yes	F61		Feeding	No	No	No	1
4631190	1000	2014-05-29 21:50:44	Yes	F61		Feeding	No	No	No	1
4631191	1000	2014-05-29 21:53:36	Yes	F61		Feeding	No	No	No	1
4631192	1000	2014-05-29 21:55:40	Yes	F61		Feeding	No	No	No	1
4631193	1000	2014-05-29 21:57:14	Yes	F61		Feeding	No	No	No	1
4631194	1000	2014-05-29 22:02:32	Yes	F61		Feeding	No	No	No	1
4631195	1000	2014-05-29 22:04:52	Yes	F61		Feeding	No	No	No	1
4631196	1000	2014-05-29 22:11:26	Yes	F61		Feeding	No	No	No	1
4631197	1000	2014-05-29 22:18:06	Yes	F61		Feeding	No	No	No	1
4631198	1000	2014-05-29 23:12:14	Yes		Mouse	Feeding	No	No	No	1
4631199	1000	2014-05-29 23:22:54	Yes	F61		Feeding	No	No	No	1
4631200	1000	2014-05-29 23:26:36	Yes	F61		Feeding	No	No	No	1
4631201	1000	2014-05-29 23:32:38	Yes	F61		Feeding	No	No	No	1
4631202	1000	2014-05-29 23:34:40	Yes	F61		Feeding	No	No	No	1
4631203	1000	2014-05-29 23:37:28	Yes	F61		Feeding	No	No	No	1
4631204	1000	2014-05-29 23:45:36	Yes	F61		Feeding	No	No	No	1
4631205	1000	2014-05-29 23:48:20	Yes	F61		Feeding	No	No	No	1
4631206	1000	2014-05-29 23:49:50	Yes	F61		Caching	No	No	No	1
4631207	1000	2014-05-30 01:08:58	Yes		Red fox	Feeding	No	No	No	1
4631208	1000	2014-05-30 07:53:04	No							0
4630827	1000	2014-05-27 13:41:50	No							0
4630828	1000	2014-05-27 13:43:48	No							0
4630829	1000	2014-05-27 15:34:18	No							0
4630830	1000	2014-05-27 15:36:14	No							0
4630831	1000	2014-05-27 15:40:36	No							0
4630832	1000	2014-05-27 15:42:26	No							0
4630833	1000	2014-05-27 15:46:10	Yes		Magpie	Nothing	No	No	No	1
4630834	1000	2014-05-27 15:47:56	No							0
4630835	1000	2014-05-27 15:51:34	No							0
4630836	1000	2014-05-27 15:54:00	No							0
4630837	1000	2014-05-27 16:01:06	No							0
4630838	1000	2014-05-27 16:04:08	No							0
4630839	1000	2014-05-27 16:55:48	Yes		Magpie	Feeding	No	No	No	1
4630840	1000	2014-05-27 17:11:56	No							0
4630841	1000	2014-05-27 17:22:26	No							0
4630842	1000	2014-05-27 17:50:16	Yes		Magpie	Nothing	No	No	No	1
4630843	1000	2014-05-27 18:31:24	No							0
4630844	1000	2014-05-27 18:43:00	No							0
4630845	1000	2014-05-27 19:07:02	No							0
4630846	1000	2014-05-27 19:58:42	No							0
4630847	1000	2014-05-27 20:41:10	No							0
4630848	1000	2014-05-27 20:43:00	No							0
4630849	1000	2014-05-27 22:47:16	No							0
4630850	1000	2014-05-27 22:48:46	Yes	F61		Feeding	Yes	No	No	1	weird vocalizations, don't think its from f61
4630851	1000	2014-05-27 22:50:20	Yes	F61		Feeding	No	No	No	1
4630852	1000	2014-05-27 22:51:50	Yes	F61		Feeding	No	No	No	1
4630853	1000	2014-05-27 22:53:56	Yes	F61		Feeding	No	No	No	1
4630854	1000	2014-05-27 22:55:26	Yes	F61		Feeding	No	No	No	1
4630855	1000	2014-05-27 22:57:30	Yes	F61		Feeding	No	No	No	1
4630856	1000	2014-05-27 22:59:00	Yes	F61		Feeding	No	No	No	1
4630857	1000	2014-05-27 23:00:30	Yes	F61		Feeding	No	No	No	1
4630858	1000	2014-05-27 23:02:36	Yes	F61		Feeding	No	No	No	1
4630859	1000	2014-05-27 23:04:18	Yes	F61		Feeding	No	No	No	1
4630860	1000	2014-05-27 23:05:48	Yes	F61		Feeding	No	No	No	1
4630861	1000	2014-05-27 23:07:16	Yes	F61		Feeding	No	No	No	1
4630862	1000	2014-05-27 23:08:46	Yes	F61		Feeding	No	No	No	1
4630863	1000	2014-05-27 23:10:20	Yes	F61		Feeding	No	No	No	1
4630864	1000	2014-05-27 23:11:54	Yes	F61		Feeding	No	No	No	1
4630865	1000	2014-05-27 23:13:28	Yes	F61		Feeding	No	No	No	1
4630866	1000	2014-05-27 23:14:56	Yes	F61		Feeding	No	No	No	1
4630867	1000	2014-05-27 23:16:30	Yes	F61		Feeding	No	No	No	1
4630868	1000	2014-05-27 23:18:04	Yes	F61		Feeding	No	No	No	1
4630869	1000	2014-05-27 23:19:34	Yes	F61		Feeding	No	No	No	1
4630870	1000	2014-05-27 23:21:04	Yes	F61		Feeding	No	No	No	1
4630871	1000	2014-05-27 23:24:20	Yes	F61		Feeding	No	No	No	1
4630872	1000	2014-05-27 23:26:28	Yes	F61		Feeding	No	No	No	1
4630873	1000	2014-05-27 23:28:02	Yes	F61		Nothing	No	No	No	1
4630874	1000	2014-05-27 23:30:08	Yes	F61		Caching	No	No	No	1
4630875	1000	2014-05-28 03:07:48	Yes	F61		Feeding	No	No	No	1
4630876	1000	2014-05-28 03:09:18	Yes	F61		Feeding	No	No	No	1
4630877	1000	2014-05-28 03:11:22	Yes	F61		Feeding	No	No	No	1
4630878	1000	2014-05-28 03:14:02	Yes	F61		Feeding	No	No	No	1
4630879	1000	2014-05-28 03:15:32	Yes	F61		Feeding	No	No	No	1
4630880	1000	2014-05-28 03:25:52	Yes	F61		Feeding	No	No	No	1
4630881	1000	2014-05-28 03:29:06	Yes	F61		Feeding	No	No	No	1
4630882	1000	2014-05-28 03:30:38	Yes	F61		Feeding	No	No	No	1
4630883	1000	2014-05-28 03:32:56	Yes	F61		Feeding	No	No	No	1
4630884	1000	2014-05-28 03:34:26	Yes	F61		Feeding	No	No	No	1
4630885	1000	2014-05-28 03:36:04	Yes	F61		Feeding	No	No	No	1
4630886	1000	2014-05-28 03:38:16	Yes	F61		Feeding	No	No	No	1
4630887	1000	2014-05-28 03:40:30	Yes	F61		Feeding	No	No	No	1
4630888	1000	2014-05-28 03:43:10	Yes	F61		Feeding	No	No	No	1
4630889	1000	2014-05-28 03:45:52	Yes	F61		Feeding	No	No	No	1
4630890	1000	2014-05-28 05:11:52	Yes	F61		Feeding	No	No	No	1
4630891	1000	2014-05-28 05:13:22	Yes	F61		Feeding	No	No	No	1
4630892	1000	2014-05-28 05:14:56	Yes	F61		Feeding	No	No	No	1
4630893	1000	2014-05-28 05:16:46	Yes	F61		Feeding	No	No	No	1
4630894	1000	2014-05-28 05:18:22	Yes	F61		Feeding	No	No	No	1
4630895	1000	2014-05-28 05:19:54	Yes	F61		Caching	No	No	No	1
4630896	1000	2014-05-28 05:22:00	Yes	F61		Caching	No	No	No	1
4630897	1000	2014-05-28 05:54:42	Yes		Magpie	Feeding	No	No	No	1
4630898	1000	2014-05-28 05:56:32	Yes		Magpie	Feeding	No	No	No	1
4630928	1000	2014-05-28 13:01:42	No							0
4630929	1000	2014-05-28 13:03:12	No							0
4630930	1000	2014-05-28 13:05:08	No							0
4630931	1000	2014-05-28 13:07:12	No							0
4630932	1000	2014-05-28 13:10:00	Yes		Magpie	Feeding	No	No	No	1
4630933	1000	2014-05-28 13:11:28	No							0
4630934	1000	2014-05-28 13:13:22	No							0
4630935	1000	2014-05-28 13:15:00	No							0
4630936	1000	2014-05-28 13:16:36	No							0
4630937	1000	2014-05-28 13:18:06	No							0
4630938	1000	2014-05-28 13:19:36	No							0
4630939	1000	2014-05-28 13:22:18	No							0
4630940	1000	2014-05-28 13:25:28	No							0
4630941	1000	2014-05-28 13:28:46	No							0
4630942	1000	2014-05-28 13:33:42	No							0
4630943	1000	2014-05-28 13:35:48	No							0
4630944	1000	2014-05-28 13:37:22	No							0
4630945	1000	2014-05-28 13:43:58	No							0
4630946	1000	2014-05-28 13:45:30	No							0
4630947	1000	2014-05-28 13:47:02	No							0
4630948	1000	2014-05-28 13:48:34	No							0
4630949	1000	2014-05-28 13:50:36	No							0
4630950	1000	2014-05-28 13:52:06	No							0
4630951	1000	2014-05-28 13:54:12	No							0
4630952	1000	2014-05-28 13:56:18	No							0
4630953	1000	2014-05-28 13:57:48	No							0
4630954	1000	2014-05-28 13:59:52	No							0
4630955	1000	2014-05-28 14:01:26	No							0
4630956	1000	2014-05-28 14:02:58	No							0
4630957	1000	2014-05-28 14:04:34	No							0
4630958	1000	2014-05-28 14:06:02	No							0
4630959	1000	2014-05-28 14:07:34	No							0
4630960	1000	2014-05-28 14:09:36	No							0
4630961	1000	2014-05-28 14:11:08	No							0
4630962	1000	2014-05-28 14:12:40	No							0
4630963	1000	2014-05-28 14:14:10	No							0
4630964	1000	2014-05-28 14:16:10	No							0
4630965	1000	2014-05-28 14:17:40	No							0
4630966	1000	2014-05-28 14:19:10	No							0
4630967	1000	2014-05-28 14:21:10	No							0
4630968	1000	2014-05-28 14:22:40	No							0
4630969	1000	2014-05-28 14:24:08	No							0
4630970	1000	2014-05-28 14:26:10	Yes		Magpie	Nothing	Yes	No	No	1
4630971	1000	2014-05-28 14:27:42	Yes		Magpie	Feeding	Yes	No	No	1
4630972	1000	2014-05-28 14:30:16	Yes		Magpie	Nothing	Yes	No	No	1
4630973	1000	2014-05-28 14:32:52	No							0
4630974	1000	2014-05-28 14:34:20	No							0
4630975	1000	2014-05-28 14:35:54	No							0
4630976	1000	2014-05-28 14:37:26	No							0
4630977	1000	2014-05-28 14:40:00	No							0
4630978	1000	2014-05-28 14:41:28	No							0
4630979	1000	2014-05-28 14:44:02	No							0
4630980	1000	2014-05-28 14:46:46	No							0
4630981	1000	2014-05-28 14:48:18	No							0
4630982	1000	2014-05-28 14:49:50	No							0
4630983	1000	2014-05-28 14:51:30	No							0
4630984	1000	2014-05-28 14:52:58	No							0
4630985	1000	2014-05-28 14:54:30	No							0
4630986	1000	2014-05-28 14:56:46	No							0
4630987	1000	2014-05-28 14:58:28	No							0
4630988	1000	2014-05-28 15:00:02	No							0
4630989	1000	2014-05-28 15:03:48	No							0
4630990	1000	2014-05-28 15:09:36	Yes		Magpie	Feeding	No	No	No	1
4630991	1000	2014-05-28 15:11:46	No							0
4630992	1000	2014-05-28 15:13:52	No							0
4630993	1000	2014-05-28 15:15:24	No							0
4630994	1000	2014-05-28 15:17:00	No							0
4630995	1000	2014-05-28 15:20:04	No							0
4630996	1000	2014-05-28 15:21:46	No							0
4630997	1000	2014-05-28 15:23:18	No							0
4630998	1000	2014-05-28 15:24:46	No							0
4630999	1000	2014-05-28 15:26:48	No							0
4631000	1000	2014-05-28 15:29:28	No							0
4631001	1000	2014-05-28 15:31:28	No							0
4631002	1000	2014-05-28 15:33:42	No							0
4631003	1000	2014-05-28 15:35:46	No							0
4631004	1000	2014-05-28 15:37:32	No							0
4631005	1000	2014-05-28 15:39:06	No							0
4631006	1000	2014-05-28 15:40:38	No							0
4631007	1000	2014-05-28 15:42:10	No							0
4631008	1000	2014-05-28 15:43:44	No							0
4631009	1000	2014-05-28 15:46:24	No							0
4631010	1000	2014-05-28 15:51:22	No							0
4631011	1000	2014-05-28 15:54:58	No							0
4631012	1000	2014-05-28 15:58:46	No							0
4631013	1000	2014-05-28 16:01:18	No							0
4631014	1000	2014-05-28 16:04:14	No							0
4631015	1000	2014-05-28 16:05:42	No							0
4631016	1000	2014-05-28 16:08:00	No							0
4631017	1000	2014-05-28 16:11:26	No							0
4631018	1000	2014-05-28 16:17:44	No							0
4631019	1000	2014-05-28 16:22:50	No							0
4631020	1000	2014-05-28 16:27:06	No							0
4631021	1000	2014-05-28 16:30:20	No							0
4631022	1000	2014-05-28 16:38:48	No							0
4631023	1000	2014-05-28 16:42:56	No							0
4631024	1000	2014-05-28 16:44:44	No							0
4631025	1000	2014-05-28 16:47:18	No							0
4631026	1000	2014-05-28 16:50:44	No							0
4631027	1000	2014-05-28 16:55:20	No							0
4631028	1000	2014-05-28 16:57:28	No							0
4631029	1000	2014-05-28 17:00:30	No							0
4631030	1000	2014-05-28 17:02:14	No							0
4631031	1000	2014-05-28 17:03:48	No							0
4631032	1000	2014-05-28 17:06:14	No							0
4631033	1000	2014-05-28 17:08:56	No							0
4631034	1000	2014-05-28 17:12:08	No							0
4631035	1000	2014-05-28 17:13:46	No							0
4631036	1000	2014-05-28 17:15:16	No							0
4631037	1000	2014-05-28 17:18:08	No							0
4631038	1000	2014-05-28 17:19:48	No							0
4631039	1000	2014-05-28 17:21:36	No							0
4631040	1000	2014-05-28 17:23:06	No							0
4631041	1000	2014-05-28 17:24:44	No							0
4631042	1000	2014-05-28 17:29:56	No							0
4631043	1000	2014-05-28 17:31:30	No							0
4631044	1000	2014-05-28 17:33:18	No							0
4631045	1000	2014-05-28 17:37:16	No							0
4631046	1000	2014-05-28 17:48:36	No							0
4631047	1000	2014-05-28 18:30:58	No							0
4631048	1000	2014-05-28 18:41:56	No							0
4631049	1000	2014-05-28 19:01:26	No							0
4631050	1000	2014-05-28 19:34:12	No							0
4631051	1000	2014-05-28 19:49:34	No							0
4631052	1000	2014-05-28 20:00:16	No							0
4631053	1000	2014-05-28 20:03:28	No							0
4631054	1000	2014-05-28 20:10:20	No							0
4631055	1000	2014-05-28 21:15:22	No							0
4631056	1000	2014-05-28 21:22:44	No							0
4631057	1000	2014-05-28 21:39:26	No							0
4631058	1000	2014-05-28 21:42:54	No							0
4631059	1000	2014-05-28 21:47:16	Yes	F61		Feeding	No	No	No	1
4631060	1000	2014-05-28 21:49:46	Yes	F61		Feeding	No	No	No	1
4631061	1000	2014-05-28 21:53:12	Yes	F61		Feeding	No	No	No	1
4631062	1000	2014-05-28 21:54:46	Yes	F61		Feeding	No	No	No	1
4631063	1000	2014-05-28 21:57:48	Yes	F61		Feeding	No	No	No	1
4631064	1000	2014-05-28 21:59:30	Yes	F61		Feeding	No	No	No	1
4631065	1000	2014-05-28 22:02:54	Yes	F61		Feeding	No	No	No	1
4631066	1000	2014-05-28 22:04:32	Yes	F61		Feeding	No	No	No	1
4631067	1000	2014-05-28 22:06:06	Yes	F61		Feeding	No	No	No	1
4631068	1000	2014-05-28 22:07:44	Yes	F61		Feeding	No	No	No	1
4631069	1000	2014-05-28 22:09:58	Yes	F61		Feeding	No	No	No	1
4631070	1000	2014-05-28 22:11:48	Yes	F61		Feeding	No	No	No	1
4631071	1000	2014-05-28 22:15:36	Yes	F61		Feeding	No	No	No	1
4631072	1000	2014-05-28 22:17:42	Yes	F61		Feeding	No	No	No	1
4631073	1000	2014-05-28 22:20:44	Yes	F61		Feeding	No	No	No	1
4631074	1000	2014-05-28 22:22:58	Yes	F61		Feeding	No	No	No	1
4631075	1000	2014-05-28 22:25:46	Yes	F61		Feeding	No	No	No	1
4631076	1000	2014-05-28 22:27:58	Yes	F61		Nothing	No	No	No	1
4631077	1000	2014-05-28 22:46:50	Yes		Mouse	Feeding	No	No	No	1
4631078	1000	2014-05-29 00:43:18	Yes	F61		Feeding	No	No	No	1
4631079	1000	2014-05-29 00:47:38	Yes	F61		Feeding	No	No	No	1
4631080	1000	2014-05-29 00:52:08	Yes	F61		Feeding	No	No	No	1
4631081	1000	2014-05-29 00:53:36	Yes	F61		Feeding	No	No	No	1
4631082	1000	2014-05-29 00:55:10	Yes	F61		Feeding	No	No	No	1
4631083	1000	2014-05-29 00:59:10	Yes	F61		Feeding	No	No	No	1
4631084	1000	2014-05-29 01:00:56	Yes	F61		Feeding	No	No	No	1
4631085	1000	2014-05-29 01:02:48	Yes	F61		Feeding	No	No	No	1
4631086	1000	2014-05-29 01:04:28	Yes	F61		Feeding	No	No	No	1
4631087	1000	2014-05-29 01:10:42	Yes	F61		Feeding	No	No	No	1
4631088	1000	2014-05-29 01:21:44	Yes	F61		Feeding	No	No	No	1
4631089	1000	2014-05-29 01:26:12	Yes	F61		Feeding	No	No	No	1
4631090	1000	2014-05-29 01:31:28	Yes	F61		Feeding	No	No	No	1
4631091	1000	2014-05-29 01:38:16	Yes	F61		Feeding	No	No	No	1
4631092	1000	2014-05-29 01:40:24	Yes	F61		Feeding	No	No	No	1
4631093	1000	2014-05-29 01:48:00	Yes	F61		Feeding	No	No	No	1
4631094	1000	2014-05-29 01:53:42	Yes	F61		Feeding	No	No	No	1
4631095	1000	2014-05-29 01:57:32	Yes	F61		Feeding	No	No	No	1
4631096	1000	2014-05-29 02:03:14	Yes	F61		Feeding	No	No	No	1
4631097	1000	2014-05-29 02:05:00	Yes	F61		Feeding	No	No	No	1
4631098	1000	2014-05-29 02:06:34	Yes	F61		Feeding	No	No	No	1
4631099	1000	2014-05-29 02:08:08	Yes	F61		Feeding	No	No	No	1
4631100	1000	2014-05-29 02:10:50	Yes	F61		Feeding	No	No	No	1
4631101	1000	2014-05-29 02:13:38	Yes	F61		Nothing	No	No	No	1
4631102	1000	2014-05-29 05:07:04	Yes	F61		Feeding	No	No	No	1
4631103	1000	2014-05-29 05:11:38	Yes	F61		Feeding	No	No	No	1
4631104	1000	2014-05-29 05:13:14	Yes	F61		Feeding	No	No	No	1
4631105	1000	2014-05-29 05:17:16	Yes	F61		Feeding	No	No	No	1
4631106	1000	2014-05-29 05:20:00	Yes	F61		Feeding	No	No	No	1
4631107	1000	2014-05-29 05:22:02	Yes	F61		Feeding	No	No	No	1
4631108	1000	2014-05-29 05:24:44	Yes	F61		Feeding	No	No	No	1
4631109	1000	2014-05-29 05:26:26	Yes	F61		Feeding	No	No	No	1
4631110	1000	2014-05-29 05:31:02	Yes	F61		Caching	No	No	No	1
4631111	1000	2014-05-29 09:01:10	Yes		Red squirrel	Nothing	No	No	No	1
4631112	1000	2014-05-29 11:45:48	Yes		Magpie	Nothing	No	No	No	1
4631113	1000	2014-05-29 11:52:00	Yes		Magpie	Feeding	Yes	No	No	1
4631114	1000	2014-05-29 12:18:40	Yes		Magpie	Feeding	No	No	No	1
4631115	1000	2014-05-29 12:21:20	Yes		Magpie	Feeding	No	No	No	1
4631116	1000	2014-05-29 12:23:42	Yes		Magpie	Feeding	No	No	No	1
4631117	1000	2014-05-29 12:29:02	No		Flies					0
4631118	1000	2014-05-29 12:34:00	No							0
4631119	1000	2014-05-29 12:37:10	No							0
4631120	1000	2014-05-29 12:44:24	No							0
4631121	1000	2014-05-29 12:51:18	Yes		Magpie	Feeding	No	No	No	1
4631122	1000	2014-05-29 12:56:16	No							0
4631123	1000	2014-05-29 13:01:38	Yes		Magpie	Nothing	No	No	No	1
4631124	1000	2014-05-29 13:04:10	No							0
4631125	1000	2014-05-29 13:05:42	No							0
4631126	1000	2014-05-29 13:09:34	No							0
4631127	1000	2014-05-29 13:11:24	Yes		Magpie	Feeding	No	No	No	1
4631128	1000	2014-05-29 13:13:10	Yes		Magpie	Feeding	No	No	No	1
4631129	1000	2014-05-29 13:15:56	Yes		Magpie	Feeding	No	No	No	1
4631130	1000	2014-05-29 13:18:06	No							0
4631131	1000	2014-05-29 13:20:04	No							0
4631132	1000	2014-05-29 13:25:34	No							0
4631133	1000	2014-05-29 13:27:50	No							0
4631134	1000	2014-05-29 13:30:34	No							0
4631135	1000	2014-05-29 13:32:28	No							0
4631136	1000	2014-05-29 13:34:06	No							0
4631137	1000	2014-05-29 13:37:52	No							0
4631138	1000	2014-05-29 13:44:40	Yes		Magpie	Feeding	No	No	No	1
4631139	1000	2014-05-29 13:48:44	No							0
4631140	1000	2014-05-29 13:53:16	No							0
4631141	1000	2014-05-29 13:56:44	No							0
4631142	1000	2014-05-29 14:01:10	No							0
4631143	1000	2014-05-29 14:03:02	No							0
4631144	1000	2014-05-29 14:05:02	No							0
4631145	1000	2014-05-29 14:07:34	Yes		Magpie	Feeding	No	No	No	1
4631146	1000	2014-05-29 14:09:48	Yes		Magpie	Feeding	No	No	No	1
4631147	1000	2014-05-29 14:11:18	Yes		Magpie	Feeding	No	No	No	1
4631148	1000	2014-05-29 14:17:46	No							0
4631149	1000	2014-05-29 14:23:22	No							0
4631150	1000	2014-05-29 14:32:46	No							0
4631151	1000	2014-05-29 14:35:22	No							0
4631152	1000	2014-05-29 14:40:12	No							0
5577341	1022	2014-06-13 13:54:38	No							0
5577342	1022	2014-06-13 23:41:54	Yes		Mouse	Nothing	No	No	No	1
5577343	1022	2014-06-13 23:43:36	Yes		Mouse	Nothing	No	No	No	1
5577344	1022	2014-06-14 02:58:16	Yes		Mouse	Nothing	No	No	No	1
5577345	1022	2014-06-14 07:07:12	No							0
5577346	1022	2014-06-14 07:12:46	Yes		Gray jay	Feeding	Yes	No	No	2
5577347	1022	2014-06-14 07:19:54	Yes		Gray jay	Feeding	Yes	No	No	2
5577348	1022	2014-06-14 07:24:24	Yes		Gray jay	Feeding	Yes	No	No	2
5577349	1022	2014-06-14 08:42:38	Yes		Gray jay	Feeding	No	No	No	1
5577350	1022	2014-06-14 12:10:34	No							0
5577351	1022	2014-06-14 12:38:02	No							0
5577352	1022	2014-06-14 12:48:32	No							0
5577353	1022	2014-06-14 17:31:34	No							0
5577354	1022	2014-06-14 23:01:28	Yes		Mouse	Nothing	No	No	No	1
5577355	1022	2014-06-15 12:00:30	No							0
5577356	1022	2014-06-15 12:02:38	No							0
5577357	1022	2014-06-15 12:05:46	No							0
5577358	1022	2014-06-15 12:08:38	No							0
5577359	1022	2014-06-15 13:24:52	Yes		Gray jay	Feeding	Yes	No	No	1
5577360	1022	2014-06-15 13:26:24	Yes		Gray jay	Feeding	Yes	No	No	1
5577361	1022	2014-06-15 21:20:02	Yes		Mouse	Nothing	No	No	No	1
5577362	1022	2014-06-16 12:49:06	No							0
5577363	1022	2014-06-16 14:44:58	No							0
5577364	1022	2014-06-16 21:54:18	No							0
5577365	1022	2014-06-16 21:56:42	No							0
5577366	1022	2014-06-16 22:00:18	Yes		Red fox	Nothing	No	No	No	1	black phase fox
5577367	1022	2014-06-16 22:09:12	No							0
5577368	1022	2014-06-16 22:14:12	No							0
5577369	1022	2014-06-18 10:24:40	No							0
5577370	1022	2014-06-18 10:26:42	No							0
6415776	1026	2014-06-14 11:00:50	No							0
6415777	1026	2014-06-14 11:02:38	No							0
6415778	1026	2014-06-14 11:04:20	No							0
6415779	1026	2014-06-14 17:20:34	Yes	F96		Feeding	No	No	No	1	dragged carcass
6415780	1026	2014-06-14 17:41:54	Yes	F96		Walking/Moving	No	No	No	1
6415781	1026	2014-06-17 00:26:16	Yes	F96		Walking/Moving	No	No	No	1
6415782	1026	2014-06-18 09:34:40	No							0
6415783	1026	2014-06-18 09:35:58	No							0
6415784	1026	2014-06-18 20:20:42	Yes		American marten	Feeding	No	No	No	1
6415785	1026	2014-06-18 20:22:18	Yes		American marten	Feeding	No	No	No	1
6415786	1026	2014-06-18 20:23:50	Yes		American marten	Feeding	No	No	No	1
6415787	1026	2014-06-18 20:33:26	Yes		Black bear	Investigating camera	No	No	No	1
6415788	1026	2014-06-18 20:37:38	Yes		Black bear	Walking/Moving	No	No	No	1
6415789	1026	2014-06-18 20:39:00	Yes		Black bear	Investigating camera	No	No	No	1
6415790	1026	2014-06-18 20:40:32	No							0
6415791	1026	2014-06-18 20:44:06	Yes		Black bear	Feeding	No	No	No	1
6415792	1026	2014-06-18 20:50:12	Yes		Black bear	Walking/Moving	No	No	No	1
6415793	1026	2014-06-14 16:20:06	Yes	F96		Walking/Moving	No	No	No	1
6415794	1026	2014-06-14 16:22:04	No							0
6415795	1026	2014-06-14 16:41:30	Yes	F96		Walking/Moving	No	No	No	1
6415796	1026	2014-06-14 16:42:46	No							0
6415797	1026	2014-06-18 08:34:18	No							0
6415798	1026	2014-06-18 08:35:04	No							0
4696863	1071	2014-07-15 17:37:42	Yes	F61		Feeding	No	No	No	1	different kill?
4696864	1071	2014-07-15 17:54:38	Yes	F61		Feeding	No	No	No	1	Different kill?
4696865	1071	2014-07-15 17:58:36	Yes	F61		Feeding	No	No	No	1	different kill?
4696866	1071	2014-07-16 10:17:14	No							0
4696867	1071	2014-07-16 11:27:06	No							0
4696868	1071	2014-07-31 16:36:48	No		Flies					0
4696869	1071	2014-07-31 16:54:56	Yes	F61		Behavior	No	No	No	1	runs from or after something
4696870	1071	2014-07-31 17:03:14	Yes	F61		Behavior	No	No	No	1	as she uncovers the fawn it pops out and scares her and she hisses
4696871	1071	2014-07-31 17:05:02	Yes	F61		Feeding	No	No	No	1
4696872	1071	2014-07-31 17:07:46	Yes	F61		Feeding	No	No	No	1
4696873	1071	2014-07-31 17:19:30	Yes	F61		Feeding	No	No	No	1
4696874	1071	2014-07-31 17:21:56	Yes	F61		Feeding	No	No	No	1
4696875	1071	2014-07-31 17:23:12	Yes	F61		Feeding	No	No	No	1
4696876	1071	2014-07-31 17:27:04	Yes	F61		Caching	No	No	No	1
4696877	1071	2014-08-01 06:11:44	Yes	F61		Feeding	No	No	No	1
4696878	1071	2014-08-01 16:15:28	Yes	F61		Feeding	No	No	No	1
4696879	1071	2014-08-01 16:24:10	Yes	F61		Feeding	No	No	No	1	robin alarming
4696880	1071	2014-08-01 16:28:04	No		Flies					0
4696881	1071	2014-08-01 19:15:48	Yes	F61		Nothing	No	No	No	1
4696882	1071	2014-08-03 14:46:58	No		Flies					0
4696883	1071	2014-08-04 14:13:26	No							0
4696884	1071	2014-08-04 14:46:10	No							0
4696885	1071	2014-08-04 15:13:38	No							0
4696886	1071	2014-08-04 17:20:06	No							0
4696887	1071	2014-08-05 09:07:22	No							0
4696888	1071	2014-08-05 09:09:12	No							0
4696889	1071	2014-08-05 09:10:42	No							0
4696890	1071	2014-08-05 09:17:22	No							0
4718875	1071	2014-07-31 11:30:40	No							0
4718876	1071	2014-07-31 11:32:22	No							0
4718877	1071	2014-07-31 15:35:06	No							0
4718878	1071	2014-07-31 15:52:32	Yes	F61		Feeding	No	No	No	1
4718879	1071	2014-07-31 15:57:48	Yes	F61		Feeding	No	No	No	1	uncovers fawn it pops out and scares her and she hisses
4718880	1071	2014-07-31 16:24:46	Yes	F61		Caching	No	No	No	1
4718881	1071	2014-07-31 20:16:50	Yes	F61		Feeding	No	No	No	1
844181	11	2013-04-21 18:28:52	Yes	F61, F96		Feeding	No	No	No	2
844182	11	2013-04-21 18:31:08	Yes	F61, F96, M80		Feeding	Yes	No	No	3	frostbite sneezing
844183	11	2013-04-21 18:34:20	Yes	F61		Feeding	No	No	No	1
844184	11	2013-04-21 18:54:26	Yes	F61		Feeding	No	No	No	1
844185	11	2013-04-21 19:12:48	Yes	F96		Feeding	No	No	No	1
844186	11	2013-04-21 19:31:32	Yes	F61, M80		Feeding	Yes	No	No	2
844187	11	2013-04-21 19:35:14	Yes	F61, M80		Feeding	No	No	No	2
844188	11	2013-04-21 19:46:28	Yes	F61, M80		Feeding	No	No	No	2
844189	11	2013-04-21 19:49:12	Yes	F61, M80		Feeding	Yes	No	No	2
844190	11	2013-04-21 19:54:28	Yes	F61, M80		Feeding	No	No	No	2
844191	11	2013-04-21 19:56:46	Yes	F61, M80		Feeding	No	No	No	2
844192	11	2013-04-21 20:00:54	Yes	F61, M80		Feeding	Yes	No	No	2
844193	11	2013-04-21 20:05:36	Yes	F96		Feeding	No	No	No	1
844194	11	2013-04-21 20:11:40	No							0
844195	11	2013-04-21 20:33:10	Yes	F61, F96		Nothing	No	No	No	2
844196	11	2013-04-21 20:53:18	No							0
844197	11	2013-04-21 21:20:14	Yes	F61, M80		Playing	Yes	Yes	No	2
844198	11	2013-04-21 21:23:16	Yes	F61, F96, M80		Behavior	Yes	Yes	No	3	m80 playing w head, 61 chasing m80
844199	11	2013-04-21 21:41:02	Yes	F61		Feeding	No	No	No	1
844200	11	2013-04-21 21:57:28	Yes	F96		Feeding	No	No	No	1
844201	11	2013-04-21 22:12:38	No							0
844202	11	2013-04-21 22:48:56	Yes		Red fox	Feeding	No	No	No	1
844203	11	2013-04-21 23:13:44	Yes		Red fox	Feeding	No	No	No	1
844204	11	2013-04-21 23:45:32	Yes	F61		Behavior	No	No	No	1
844205	11	2013-04-21 23:50:20	No							0	sounds of urinating
844206	11	2013-04-22 00:24:48	Yes	M80		Feeding	No	No	No	1
844207	11	2013-04-22 00:28:12	Yes	M80		Feeding	No	No	No	1
844210	11	2013-04-22 01:12:18	Yes	F61		Feeding	No	No	No	1
844211	11	2013-04-22 01:14:26	Yes	F61		Investigating camera	No	No	No	1
844212	11	2013-04-22 01:18:18	Yes	F96		Feeding	No	No	No	1
844213	11	2013-04-22 01:22:34	Yes	F96		Feeding	No	No	No	1
844214	11	2013-04-22 01:34:44	Yes	F96		Nothing	Yes	No	No	1
844215	11	2013-04-22 01:36:52	Yes	M80		Playing	Yes	No	No	1	m80 catching snowflakes
844216	11	2013-04-22 01:39:40	No							0
844217	11	2013-04-22 01:44:24	No							0
844218	11	2013-04-22 01:56:08	Yes	F61		Nothing	Yes	No	No	1
844219	11	2013-04-22 02:02:30	Yes		Red fox	Feeding	No	No	No	1
844220	11	2013-04-22 02:42:14	Yes	F61		Behavior	Yes	No	No	1	f61 calling kittens
844221	11	2013-04-22 02:55:58	Yes	F61		Nothing	Yes	No	No	1
844222	11	2013-04-22 03:00:32	Yes	M80		Nothing	No	No	No	1
844223	11	2013-04-22 03:03:30	Yes	F61, F96		Feeding	No	No	No	2
844224	11	2013-04-22 03:05:50	Yes	F61		Feeding	No	No	No	1
844225	11	2013-04-22 03:13:22	Yes	F96		Feeding	No	No	No	1
844226	11	2013-04-22 03:18:52	Yes	F96		Feeding	No	No	No	1
844227	11	2013-04-22 03:22:50	Yes	F96		Nothing	No	No	No	1
844228	11	2013-04-22 03:53:34	No							0
844229	11	2013-04-22 03:56:52	No							0
844230	11	2013-04-22 04:44:48	Yes	F61		Caching	No	No	No	1
844231	11	2013-04-22 04:46:56	Yes	F61		Caching	Yes	No	No	1
844232	11	2013-04-22 05:15:18	No							0
844233	11	2013-04-22 05:19:52	Yes	M80		Caching	Yes	No	No	1
844234	11	2013-04-22 05:35:02	Yes	F61		Caching	No	No	No	1
844235	11	2013-04-22 05:37:10	Yes	F61		Caching	No	No	No	1
844236	11	2013-04-22 05:39:26	Yes	F61	Red fox	Caching	No	No	No	2	bbc fox watching in background
844237	11	2013-04-22 05:41:36	Yes	F61		Caching	No	No	No	1
844238	11	2013-04-22 05:47:02	Yes	F61		Caching	No	No	No	1
844208	11	2013-04-22 00:55:36	Yes	M80		Nothing	No	No	No	1
844209	11	2013-04-22 01:06:26	No							0
844180	11	2013-04-21 18:04:54	Yes	F96, M80		Behavior	Yes	Yes	No	2
844239	11	2013-04-22 05:49:10	Yes	F61		Caching	No	No	No	1
844240	11	2013-04-22 05:53:00	Yes	F61		Caching	No	No	No	1
844241	11	2013-04-22 05:55:08	Yes	F61		Caching	No	No	No	1
844242	11	2013-04-22 05:57:26	Yes	F61		Caching	Yes	No	No	1
844243	11	2013-04-22 06:00:18	Yes	F61		Caching	Yes	No	No	1
844244	11	2013-04-22 06:03:30	Yes	F61		Caching	Yes	No	No	1
844245	11	2013-04-22 06:26:30	Yes	F61		Caching	No	No	No	1
844246	11	2013-04-22 06:30:32	Yes	F61		Caching	No	No	No	1
844247	11	2013-04-22 06:34:16	Yes	F61		Caching	No	No	No	1
844248	11	2013-04-22 07:55:06	Yes	F61		Caching	No	No	No	1
844249	11	2013-04-22 07:57:18	Yes	F61		Caching	No	No	No	1
844250	11	2013-04-22 07:59:52	Yes	F61		Caching	Yes	No	No	1
844251	11	2013-04-22 08:02:00	Yes	F61		Nothing	Yes	No	No	1
844252	11	2013-04-22 09:29:40	No							0
844253	11	2013-04-22 09:32:22	No							0
844254	11	2013-04-22 09:35:36	No							0
844255	11	2013-04-22 09:38:24	No							0
844256	11	2013-04-22 09:40:44	No							0
844257	11	2013-04-22 09:42:26	No							0
844258	11	2013-04-22 14:40:50	No							0
6376661	110	2013-04-21 22:28:00	Yes	F109		Feeding	No	No	No	1
6376662	110	2013-04-21 22:29:34	Yes	F109		Feeding	No	No	No	1
6376663	110	2013-04-21 22:35:42	Yes	F109		Nothing	No	No	No	1	leaving in background
6376664	110	2013-04-22 01:50:28	Yes		American marten	Feeding	No	No	No	1
6376665	110	2013-04-22 01:51:58	Yes		American marten	Feeding	No	No	No	1
6376666	110	2013-04-22 02:14:34	Yes		American marten	Feeding	No	No	No	1
6376667	110	2013-04-22 02:16:40	Yes		American marten	Feeding	No	No	No	1
6376668	110	2013-04-22 02:18:14	Yes		American marten	Feeding	No	No	No	1
6376669	110	2013-04-22 02:20:14	Yes		American marten	Feeding	No	No	No	1
6376670	110	2013-04-22 04:22:48	Yes	F109		Feeding	No	No	No	1
6376671	110	2013-04-22 04:24:18	Yes	F109		Feeding	No	No	No	1
6376672	110	2013-04-22 04:25:48	Yes	F109		Feeding	No	No	No	1
6376673	110	2013-04-22 04:27:18	Yes	F109		Feeding	No	No	No	1
6376674	110	2013-04-22 04:28:50	Yes	F109		Feeding	No	No	No	1
6376675	110	2013-04-22 04:30:22	Yes	F109		Feeding	No	No	No	1
6376676	110	2013-04-22 04:31:54	Yes	F109		Feeding	No	No	No	1
6376677	110	2013-04-22 04:33:24	Yes	F109		Feeding	No	No	No	1
6376678	110	2013-04-22 04:34:54	Yes	F109		Feeding	No	No	No	1
6376679	110	2013-04-22 04:36:38	Yes	F109		Feeding	No	No	No	1
6376680	110	2013-04-22 04:38:18	Yes	F109		Feeding	No	No	No	1
6376681	110	2013-04-22 04:39:58	Yes	F109		Feeding	No	No	No	1
6376682	110	2013-04-22 04:41:32	Yes	F109		Feeding	No	No	No	1
6376683	110	2013-04-22 04:43:06	Yes	F109		Feeding	No	No	No	1
6376684	110	2013-04-22 04:44:40	Yes	F109		Feeding	No	No	No	1
6376685	110	2013-04-22 04:46:10	Yes	F109		Feeding	No	No	No	1
6376686	110	2013-04-22 04:47:46	Yes	F109		Feeding	No	No	No	1
6376687	110	2013-04-22 04:49:18	Yes	F109		Feeding	No	No	No	1
6376688	110	2013-04-22 04:50:48	Yes	F109		Feeding	No	No	No	1
6376689	110	2013-04-22 04:54:30	Yes	F109		Nothing	No	No	No	1
6376690	110	2013-04-22 05:05:00	Yes		Red fox	Feeding	No	No	No	1
6376691	110	2013-04-22 05:06:38	Yes		Red fox	Feeding	No	No	No	1
6376692	110	2013-04-22 05:08:48	Yes		Red fox	Feeding	No	No	No	1
6376693	110	2013-04-22 05:10:20	Yes		Red fox	Feeding	No	No	No	1
6376694	110	2013-04-22 05:11:58	Yes		Red fox	Feeding	No	No	No	1
6376695	110	2013-04-22 05:13:30	Yes		Red fox	Feeding	No	No	No	1
6376696	110	2013-04-22 05:15:18	Yes		Red fox	Feeding	No	No	No	1
6376697	110	2013-04-22 05:16:52	Yes		Red fox	Feeding	No	No	No	1
6376698	110	2013-04-22 05:22:26	Yes		Red fox	Feeding	No	No	No	1
6376699	110	2013-04-22 05:23:56	Yes		Red fox	Feeding	No	No	No	1
6376700	110	2013-04-22 05:25:42	Yes		Red fox	Feeding	No	No	No	1
6376701	110	2013-04-22 05:27:16	Yes		Red fox	Feeding	No	No	No	1
6376702	110	2013-04-22 05:30:00	Yes		Red fox	Feeding	No	No	No	2
6376703	110	2013-04-22 05:31:30	Yes		Red fox	Feeding	No	No	No	2
6376704	110	2013-04-22 05:33:10	Yes		Red fox	Feeding	No	No	No	1
6376705	110	2013-04-22 05:34:42	Yes		Red fox	Feeding	No	No	No	1
6376706	110	2013-04-22 05:36:12	Yes		Red fox	Feeding	No	No	No	1
6376707	110	2013-04-22 05:37:42	Yes		Red fox	Feeding	No	No	No	1
6376708	110	2013-04-22 05:39:12	Yes		Red fox	Feeding	No	No	No	1
6376709	110	2013-04-22 05:40:44	Yes		Red fox	Feeding	No	No	No	1
6376710	110	2013-04-22 05:42:26	Yes		Red fox	Feeding	No	No	No	1
6376711	110	2013-04-22 07:08:18	Yes		Gray jay	Feeding	Yes	No	No	2
6376712	110	2013-04-22 07:23:16	Yes		Gray jay	Feeding	Yes	No	No	2
6376713	110	2013-04-22 08:54:00	No							0
6376714	110	2013-04-22 10:02:44	Yes		Magpie	Feeding	No	No	No	1
6376715	110	2013-04-22 10:49:46	No							0
6376716	110	2013-04-22 10:52:36	Yes		Gray jay	Nothing	No	No	No	1
6376717	110	2013-04-22 11:29:06	No							0
6376718	110	2013-04-22 11:35:44	No							0
6376719	110	2013-04-22 11:47:44	No							0
6376720	110	2013-04-22 11:56:46	No							0
6376721	110	2013-04-22 12:01:02	Yes		Gray jay	Nothing	Yes	No	No	1
6376722	110	2013-04-22 12:06:00	No							0
6376723	110	2013-04-22 12:08:10	Yes		Gray jay	Nothing	Yes	No	No	1
6376724	110	2013-04-22 12:11:54	No							0
6376725	110	2013-04-22 12:14:18	No							0
6376726	110	2013-04-22 12:16:08	No							0
6376147	110	2012-01-08 15:44:30	Yes		Coyote	Feeding	No	No	No	1
6376148	110	2012-01-08 15:46:12	Yes		Coyote	Feeding	No	No	No	1
6376149	110	2012-01-08 15:48:06	Yes		Coyote	Feeding	No	No	No	1
6376150	110	2012-01-08 15:50:56	Yes		Coyote	Walking/Moving	No	No	No	1
6376151	110	2012-01-08 18:45:12	Yes		Red fox	Feeding	No	No	No	1
6376152	110	2012-01-08 18:47:28	Yes		Red fox	Feeding	No	No	No	1
6376153	110	2012-01-08 18:48:58	Yes	F109		Feeding	No	No	No	1
6376154	110	2012-01-08 18:50:30	Yes	F109		Feeding	No	No	No	1
6376155	110	2012-01-08 18:52:02	Yes	F109		Feeding	No	No	No	1
6376156	110	2012-01-08 18:53:34	Yes	F109		Feeding	No	No	No	1
6376157	110	2012-01-08 18:55:14	Yes	F109		Feeding	No	No	No	1
6376158	110	2012-01-08 18:57:22	Yes	F109		Feeding	No	No	No	1
6376159	110	2012-01-08 18:59:52	Yes	F109		Feeding	No	No	No	1
6376160	110	2012-01-08 19:02:36	Yes	F109		Feeding	No	No	No	1
6376161	110	2012-01-08 19:04:10	Yes	F109		Feeding	No	No	No	1
6376162	110	2012-01-08 19:06:32	Yes	F109		Feeding	No	No	No	1
6376163	110	2012-01-08 19:08:08	Yes	F109		Feeding	No	No	No	1
6376164	110	2012-01-08 19:10:02	Yes	F109		Feeding	No	No	No	1
6376165	110	2012-01-08 19:11:34	Yes	F109		Feeding	No	No	No	1
6376166	110	2012-01-08 19:14:18	Yes	F109		Feeding	No	No	No	1
6376167	110	2012-01-08 19:15:50	Yes	F109		Feeding	No	No	No	1
6376168	110	2012-01-08 19:18:32	Yes	F109		Feeding	No	No	No	1
6376169	110	2012-01-08 19:20:04	Yes	F109		Feeding	No	No	No	1
6376170	110	2012-01-08 19:22:22	Yes	F109		Feeding	No	No	No	1
6376171	110	2012-01-08 19:23:54	Yes	F109		Feeding	No	No	No	1
6376172	110	2012-01-08 19:25:36	Yes	F109		Feeding	No	No	No	1
6376173	110	2012-01-08 19:27:16	Yes	F109		Feeding	No	No	No	1
6376174	110	2012-01-08 19:28:46	Yes	F109		Feeding	No	No	No	1
6376175	110	2012-01-08 19:30:22	Yes	F109		Feeding	No	No	No	1
6376176	110	2012-01-08 19:31:52	Yes	F109		Feeding	No	No	No	1
6376177	110	2012-01-08 19:33:38	Yes	F109		Feeding	No	No	No	1
6376178	110	2012-01-08 19:35:18	Yes	F109		Feeding	No	No	No	1
6376179	110	2012-01-08 19:36:54	Yes	F109		Feeding	No	No	No	1
6376180	110	2012-01-08 19:38:34	Yes	F109		Feeding	No	No	No	1
6376181	110	2012-01-09 01:03:18	Yes		Clark's Nutcraker	Feeding	No	No	No	2
6376182	110	2012-01-09 01:37:06	Yes		Red fox	Feeding	No	No	No	1
6376183	110	2012-01-09 01:38:46	Yes		Red fox	Feeding	No	No	No	1
6376184	110	2012-01-09 01:42:40	Yes		Red fox	Feeding	No	No	No	1
6376185	110	2012-01-09 01:44:18	Yes		Red fox	Feeding	No	No	No	1
6376186	110	2012-01-09 01:45:54	Yes		Magpie, Red fox	Feeding	No	No	No	2
6376187	110	2012-01-09 01:47:28	Yes		Magpie, Red fox	Feeding	No	No	No	2
6376188	110	2012-01-09 01:49:00	Yes		Red fox	Feeding	No	No	No	1
6376189	110	2012-01-09 01:50:34	Yes		Red fox	Feeding	No	No	No	1
6376190	110	2012-01-09 01:53:10	Yes		Red fox	Feeding	No	No	No	1
6376191	110	2012-01-09 01:55:54	Yes		Red fox	Feeding	No	No	No	1
6376192	110	2012-01-09 01:57:24	Yes		Red fox	Feeding	No	No	No	1
6376193	110	2012-01-09 01:58:54	Yes		Red fox	Feeding	No	No	No	1
6376194	110	2012-01-09 02:00:30	Yes		Red fox	Feeding	No	No	No	1
6376195	110	2012-01-09 02:02:02	Yes		Red fox	Feeding	No	No	No	1
6376196	110	2012-01-09 02:03:56	Yes		Red fox	Feeding	No	No	No	1
6376197	110	2012-01-09 02:05:40	Yes		Red fox	Feeding	No	No	No	1
6376198	110	2012-01-09 02:11:14	Yes		Red fox	Feeding	No	No	No	1
6376199	110	2012-01-09 09:37:30	Yes		Red fox	Feeding	No	No	No	1
6376200	110	2012-01-09 09:41:12	Yes		Red fox	Feeding	No	No	No	1
6376211	110	2012-01-09 19:43:24	Yes		Coyote	Feeding	No	No	No	1
6376212	110	2012-01-09 19:44:58	Yes		Coyote	Feeding	No	No	No	1
6376213	110	2012-01-09 19:46:52	Yes		Coyote	Feeding	No	No	No	1
6376214	110	2012-01-09 19:48:50	Yes		Coyote	Feeding	No	No	No	1
6376215	110	2012-01-09 19:50:32	Yes		Coyote	Feeding	No	No	No	2
6376216	110	2012-01-09 19:52:10	Yes		Coyote	Feeding	No	No	No	1
6376217	110	2012-01-09 19:55:08	Yes		Coyote	Feeding	No	No	No	1
6376218	110	2012-01-09 19:57:12	Yes		Coyote	Feeding	No	No	No	1
6376219	110	2012-01-09 19:58:46	Yes		Coyote	Feeding	No	No	No	1
6376220	110	2012-01-09 20:00:36	Yes		Coyote	Feeding	No	No	No	1
6376221	110	2012-01-09 20:03:24	Yes		Coyote	Walking/Moving	No	No	No	2
6376222	110	2012-01-09 20:30:16	Yes		Coyote	Walking/Moving	No	No	No	1
6376223	110	2012-01-10 00:33:02	Yes		American marten	Feeding	No	No	No	1
6376224	110	2012-01-10 00:34:40	Yes		American marten	Feeding	No	No	No	1
6376225	110	2012-01-10 00:39:00	Yes		American marten	Feeding	No	No	No	1
6376226	110	2012-01-10 13:05:08	Yes		Red fox	Feeding	No	No	No	1
6376227	110	2012-01-10 13:07:32	Yes		Red fox	Feeding	No	No	No	1
6376228	110	2012-01-10 15:14:50	Yes		Red fox	Feeding	No	No	No	1
6376229	110	2012-01-10 15:16:30	Yes		Red fox	Feeding	No	No	No	1
6376230	110	2012-01-11 07:11:30	Yes		Red fox	Feeding	No	No	No	1
6376231	110	2012-01-11 14:01:14	Yes		Coyote	Feeding	No	No	No	1
6376232	110	2012-01-11 14:03:04	Yes		Coyote	Feeding	No	No	No	1
6376233	110	2012-01-11 14:06:02	Yes		Coyote	Feeding	No	No	No	1
6376234	110	2012-01-11 14:08:56	Yes		Coyote	Feeding	No	No	No	1
6376235	110	2012-01-11 14:12:36	Yes		Coyote	Feeding	No	No	No	1
6376236	110	2012-01-11 14:14:22	Yes		Coyote	Feeding	No	No	No	1
6376237	110	2012-01-11 14:16:08	Yes		Coyote	Feeding	No	No	No	1
6376110	110	2012-01-08 05:59:06	No							0
6376111	110	2012-01-08 10:59:44	Yes		Red fox	Feeding	No	No	No	1
6376112	110	2012-01-08 11:19:26	Yes	F109		Walking/Moving	No	No	No	1
6376113	110	2012-01-08 11:34:06	Yes	F109		Feeding	No	No	No	1
6376114	110	2012-01-08 11:36:16	Yes	F109		Feeding	No	No	No	1
6376115	110	2012-01-08 11:38:50	Yes	F109		Feeding	No	No	No	1
6376116	110	2012-01-08 11:40:52	Yes	F109		Feeding	No	No	No	1
6376117	110	2012-01-08 11:42:52	Yes	F109		Feeding	No	No	No	1
6376118	110	2012-01-08 11:44:24	Yes	F109		Feeding	No	No	No	1
6376119	110	2012-01-08 11:45:58	Yes	F109		Feeding	No	No	No	1
6376120	110	2012-01-08 11:47:44	Yes	F109		Feeding	No	No	No	1
6376121	110	2012-01-08 11:49:36	Yes	F109		Feeding	No	No	No	1
6376122	110	2012-01-08 11:51:08	Yes	F109		Feeding	No	No	No	1
6376123	110	2012-01-08 11:52:50	Yes	F109		Feeding	No	No	No	1
6376124	110	2012-01-08 11:54:54	Yes	F109		Feeding	No	No	No	1
6376125	110	2012-01-08 11:57:08	Yes	F109		Feeding	No	No	No	1
6376126	110	2012-01-08 11:58:38	Yes	F109		Feeding	No	No	No	1
6376127	110	2012-01-08 12:00:28	Yes	F109		Walking/Moving	No	No	No	1
6376128	110	2012-01-08 13:01:36	Yes		Red fox	Feeding	No	No	No	2
6376129	110	2012-01-08 13:03:36	Yes		Red fox	Feeding	No	No	No	2
6376130	110	2012-01-08 13:05:26	Yes		Red fox	Feeding	No	No	No	2
6376131	110	2012-01-08 13:07:20	Yes		Red fox	Feeding	No	No	No	2
6376132	110	2012-01-08 13:09:20	Yes		Red fox	Feeding	No	No	No	2
6376133	110	2012-01-08 13:12:58	Yes		Red fox	Feeding	No	No	No	2
6376134	110	2012-01-08 13:15:40	Yes		Red fox	Feeding	No	No	No	1
6376135	110	2012-01-08 13:17:52	Yes		Red fox	Feeding	No	No	No	1
6376136	110	2012-01-08 13:20:08	Yes		Red fox	Feeding	No	No	No	1
6376137	110	2012-01-08 13:21:38	Yes		Red fox	Feeding	No	No	No	1
6376138	110	2012-01-08 13:33:14	Yes		Red fox	Feeding	No	No	No	1
6376139	110	2012-01-08 13:35:22	Yes		Red fox	Feeding	No	No	No	1
6376140	110	2012-01-08 13:39:52	Yes		Red fox	Feeding	No	No	No	1
6376141	110	2012-01-08 13:43:06	Yes		Red fox	Feeding	No	No	No	1
6376142	110	2012-01-08 14:19:10	Yes		Red fox	Feeding	No	No	No	1
6376143	110	2012-01-08 14:22:22	Yes		Red fox	Feeding	No	No	No	1
6376144	110	2012-01-08 15:26:00	Yes		Coyote	Walking/Moving	No	No	No	1
6376145	110	2012-01-08 15:38:16	Yes		Coyote	Feeding	No	No	No	1
6376146	110	2012-01-08 15:40:30	Yes		Coyote	Feeding	No	No	No	1
6376201	110	2012-01-09 09:44:38	Yes		Red fox	Feeding	No	No	No	1
6376202	110	2012-01-09 09:47:28	Yes		Red fox	Feeding	No	No	No	1
6376203	110	2012-01-09 09:51:14	Yes		Red fox	Feeding	No	No	No	1
6376204	110	2012-01-09 09:57:06	Yes		Red fox	Feeding	No	No	No	1
6376205	110	2012-01-09 11:07:42	Yes		Red fox	Feeding	No	No	No	1
6376206	110	2012-01-09 12:02:06	Yes		Red fox	Feeding	No	No	No	1
6376207	110	2012-01-09 15:39:36	No							0
6376208	110	2012-01-09 18:23:06	Yes		Red fox	Feeding	No	No	No	1
6376209	110	2012-01-09 18:25:12	No							0
6376210	110	2012-01-09 19:41:50	Yes		Coyote	Feeding	No	No	No	1
6376238	110	2012-01-11 14:18:48	Yes		Coyote	Feeding	No	No	No	1
6376239	110	2012-01-11 14:21:56	Yes		Coyote	Feeding	No	No	No	1
6376240	110	2012-01-11 14:24:04	Yes		Coyote	Feeding	No	No	No	1
6376241	110	2012-01-11 14:28:12	Yes		Coyote	Feeding	No	No	No	1
6376242	110	2012-01-11 14:31:08	Yes		Coyote	Feeding	No	No	No	1
6376243	110	2012-01-11 14:34:04	Yes		Coyote	Feeding	No	No	No	1
6376244	110	2012-01-11 14:35:42	Yes		Coyote	Feeding	No	No	No	1
6376245	110	2012-01-11 14:38:02	Yes		Coyote	Feeding	No	No	No	1
6376246	110	2012-01-11 14:40:56	Yes		Coyote	Feeding	No	No	No	1
6376247	110	2012-01-11 14:43:48	Yes		Coyote	Feeding	No	No	No	2
6376248	110	2012-01-11 14:47:16	Yes		Coyote	Feeding	No	No	No	1
6376249	110	2012-01-11 14:49:06	Yes		Coyote	Feeding	No	No	No	1
6376250	110	2012-01-11 14:50:42	Yes		Coyote	Feeding	No	No	No	1
6376251	110	2012-01-11 14:53:06	Yes		Coyote	Feeding	No	No	No	1
6376252	110	2012-01-11 14:54:52	Yes		Coyote	Feeding	No	No	No	1
6376253	110	2012-01-11 14:56:46	Yes		Coyote	Feeding	No	No	No	1
6376254	110	2012-01-11 14:59:12	Yes		Coyote	Feeding	No	No	No	1
6376255	110	2012-01-11 15:01:34	Yes		Coyote	Feeding	No	No	No	1
6376256	110	2012-01-11 15:03:30	Yes		Coyote	Feeding	No	No	No	1
6376257	110	2012-01-11 15:05:34	Yes		Coyote	Feeding	No	No	No	1
6376258	110	2012-01-11 15:09:38	Yes		Coyote	Feeding	No	No	No	1
6376259	110	2012-01-11 15:11:52	Yes		Coyote	Feeding	No	No	No	1
6376260	110	2012-01-11 15:13:56	Yes		Coyote	Feeding	No	No	No	1
6376261	110	2012-01-11 15:15:30	Yes		Coyote	Feeding	No	No	No	1
6376262	110	2012-01-11 15:17:30	Yes		Coyote	Feeding	No	No	No	1
6376263	110	2012-01-11 15:58:50	Yes		Coyote	Feeding	No	No	No	1
6376264	110	2012-01-11 16:01:04	Yes		Coyote	Feeding	No	No	No	1
6376265	110	2012-01-11 16:02:38	Yes		Coyote	Feeding	No	No	No	1
6376266	110	2012-01-11 16:04:28	Yes		Coyote	Feeding	No	No	No	1
6376267	110	2012-01-11 16:06:32	Yes		Coyote	Feeding	No	No	No	1
6376268	110	2012-01-11 16:08:42	Yes		Coyote	Feeding	No	No	No	1
6376269	110	2012-01-11 16:10:44	Yes		Coyote	Feeding	No	No	No	1
6376270	110	2012-01-11 16:12:42	Yes		Coyote	Feeding	No	No	No	1
6376271	110	2012-01-11 16:14:16	Yes		Coyote	Feeding	No	No	No	1
6376272	110	2012-01-11 16:15:54	Yes		Coyote	Feeding	No	No	No	1
6376273	110	2012-01-11 16:18:04	Yes		Coyote	Feeding	No	No	No	1
6376274	110	2012-01-11 16:20:50	Yes		Coyote	Feeding	No	No	No	1
6376275	110	2012-01-11 16:23:48	Yes		Coyote	Feeding	No	No	No	1
6376276	110	2012-01-11 16:25:36	Yes		Coyote	Feeding	No	No	No	1
6376277	110	2012-01-13 03:57:16	Yes		Vultures	Feeding	No	No	No	1
6376278	110	2012-01-13 04:08:02	Yes		Vultures	Feeding	No	No	No	2
6376279	110	2012-01-13 04:11:30	Yes		Vultures	Feeding	No	No	No	2
6376280	110	2013-04-22 15:46:02	No							0
6376281	110	2013-04-22 20:43:10	Yes		Red fox	Feeding	No	No	No	1
6376282	110	2013-04-22 20:45:02	Yes		Red fox	Feeding	No	No	No	1
6376283	110	2013-04-22 20:50:22	Yes		Red fox	Feeding	No	No	No	1
6376284	110	2013-04-22 20:51:56	Yes		Red fox	Feeding	No	No	No	1
6376285	110	2013-04-22 21:04:22	Yes	F109		Walking/Moving	No	No	No	1
6376286	110	2013-04-22 21:19:32	Yes	F109		Feeding	No	No	No	1
6376287	110	2013-04-22 22:38:04	Yes		Red fox	Walking/Moving	No	No	No	2
6376288	110	2013-04-22 22:46:52	Yes		Red fox	Feeding	No	No	No	2
6376289	110	2013-04-22 22:48:30	Yes		Red fox	Feeding	No	No	No	2
6376290	110	2013-04-22 22:50:04	Yes		Red fox	Feeding	No	No	No	2
6376291	110	2013-04-22 22:51:34	Yes		Red fox	Feeding	No	No	No	2
6376292	110	2013-04-22 22:53:40	Yes		Red fox	Feeding	No	No	No	2
6376293	110	2013-04-22 22:55:12	Yes		Red fox	Feeding	No	No	No	2
6376294	110	2013-04-22 23:28:10	Yes		Red fox	Feeding	No	No	No	1
6376295	110	2013-04-23 00:01:44	Yes		Red fox	Feeding	No	No	No	1
6376296	110	2013-04-23 00:03:58	Yes		Red fox	Feeding	No	No	No	1
6376297	110	2013-04-23 00:05:52	Yes		Red fox	Feeding	No	No	No	1
6376298	110	2013-04-23 00:07:28	Yes		Red fox	Feeding	No	No	No	1
6376299	110	2013-04-23 01:24:32	Yes		Coyote	Feeding	No	No	No	1
6376300	110	2013-04-23 01:26:52	Yes		Coyote	Walking/Moving	No	No	No	1
6376301	110	2013-04-23 01:30:14	Yes		Coyote	Feeding	No	No	No	1
6376302	110	2013-04-23 01:32:10	Yes		Coyote	Feeding	No	No	No	1
6376303	110	2013-04-23 01:34:24	Yes		Coyote	Feeding	No	No	No	1
6376304	110	2013-04-23 04:30:28	Yes		Coyote	Feeding	No	No	No	1
6376305	110	2013-04-23 04:32:12	Yes		Red fox	Feeding	No	No	No	2
6376306	110	2013-04-23 04:33:46	Yes	F109	Red fox	Feeding	No	No	No	2	The red fox exis and a few momens later F109 enters
6376307	110	2013-04-23 04:35:18	Yes	F109		Feeding	No	No	No	1
6376308	110	2013-04-23 05:05:00	Yes	F109		Feeding	No	No	No	1
6376309	110	2013-04-23 05:06:38	Yes	F109		Feeding	No	No	No	1
6376310	110	2013-04-23 05:11:12	Yes	F109		Feeding	No	No	No	1
6376311	110	2013-04-23 05:18:06	Yes	F109		Feeding	No	No	No	1
6376312	110	2013-04-23 11:20:50	Yes		Red fox	Walking/Moving	No	No	No	1
6376313	110	2013-04-23 11:26:04	Yes		Red fox	Walking/Moving	No	No	No	1
6376314	110	2013-04-23 12:30:14	Yes		Magpie	Feeding	No	No	No	1
6376315	110	2013-04-23 14:01:24	Yes		Magpie	Feeding	No	No	No	1
6376316	110	2013-04-23 18:17:42	Yes		American marten	Feeding	No	No	No	1
6376317	110	2013-04-23 18:24:42	Yes		American marten	Feeding	No	No	No	1
6376318	110	2013-04-23 18:27:32	Yes		American marten	Feeding	No	No	No	1
6376319	110	2013-04-23 18:33:12	Yes		American marten	Feeding	No	No	No	1
6376320	110	2013-04-23 20:52:46	Yes		Red fox	Feeding	No	No	No	1
6376321	110	2013-04-23 21:31:20	Yes		Red fox	Feeding	No	No	No	1
6376322	110	2013-04-23 21:43:30	Yes		Red fox	Feeding	No	No	No	1
6376323	110	2013-04-23 21:45:54	Yes		Red fox	Feeding	No	No	No	1
6376324	110	2013-04-23 22:37:40	Yes		Red fox	Feeding	No	No	No	1
6376325	110	2013-04-24 01:14:48	Yes		American marten	Feeding	No	No	No	1
6376326	110	2013-04-24 01:25:06	No							0
6376327	110	2013-04-24 05:27:56	Yes		Coyote	Feeding	No	No	No	1
6376328	110	2013-04-24 05:29:34	Yes		Coyote	Feeding	No	No	No	1
6376329	110	2013-04-24 05:32:34	Yes		Coyote	Feeding	No	No	No	1
6376330	110	2013-04-24 05:36:32	Yes		Coyote	Feeding	No	No	No	1
6376331	110	2013-04-24 10:17:18	Yes		American marten	Feeding	No	No	No	1
6376332	110	2013-04-24 15:39:38	Yes		Magpie	Feeding	No	No	No	1
6376333	110	2013-04-24 22:28:20	Yes		Red fox	Feeding	No	No	No	1
6376334	110	2013-04-24 22:31:26	Yes		Red fox	Feeding	No	No	No	1
6376335	110	2013-04-24 22:33:36	Yes		Red fox	Feeding	No	No	No	1
6376336	110	2013-04-24 22:37:52	Yes		Red fox	Feeding	No	No	No	1
6376337	110	2013-04-24 22:39:58	Yes		Red fox	Feeding	No	No	No	1
6376338	110	2013-04-24 22:43:26	Yes		Red fox	Feeding	No	No	No	1
6376339	110	2013-04-24 22:45:34	Yes		Red fox	Feeding	No	No	No	1
6376340	110	2013-04-24 22:47:14	Yes		Red fox	Feeding	No	No	No	1
6376341	110	2013-04-24 22:53:00	Yes		Red fox	Feeding	No	No	No	1
6376342	110	2013-04-24 23:23:56	Yes		American marten	Feeding	No	No	No	1
6376343	110	2013-04-24 23:29:10	Yes		American marten	Feeding	No	No	No	1
6376344	110	2013-04-24 23:37:24	Yes		American marten	Feeding	No	No	No	1
6376345	110	2013-04-24 23:39:36	Yes		American marten	Feeding	No	No	No	1
6376346	110	2013-04-25 00:59:28	Yes		Red fox	Feeding	No	No	No	1
6376347	110	2013-04-25 16:56:56	Yes		Red fox	Feeding	No	No	No	1
6376348	110	2013-04-25 22:32:18	No							0
6376349	110	2013-04-25 22:54:00	Yes		Red fox	Feeding	No	No	No	1
6376350	110	2013-04-25 22:57:42	Yes		Red fox	Walking/Moving	No	No	No	1
6376351	110	2013-04-26 02:11:04	Yes		Coyote	Feeding	No	No	No	1
6376352	110	2013-04-26 02:43:20	Yes		Red fox	Feeding	No	No	No	1
6376353	110	2013-04-26 02:44:56	Yes		Red fox	Feeding	No	No	No	1
6376354	110	2013-04-26 02:46:32	Yes		Red fox	Feeding	No	No	No	1
6376355	110	2013-04-26 02:54:28	Yes		Red fox	Feeding	No	No	No	1
6376356	110	2013-04-26 03:00:56	Yes		Red fox	Feeding	No	No	No	1
6376357	110	2013-04-26 03:43:10	Yes		Coyote	Feeding	No	No	No	1
6376358	110	2013-04-26 03:46:26	Yes		Coyote	Feeding	No	No	No	1
6376359	110	2013-04-26 06:30:22	Yes		American marten	Feeding	No	No	No	1
6376360	110	2013-04-26 06:36:18	Yes		American marten	Feeding	No	No	No	1
6376361	110	2013-04-26 06:45:20	Yes		American marten	Walking/Moving	No	No	No	1
6376362	110	2013-04-26 07:46:02	Yes		Magpie	Feeding	No	No	No	2
6376363	110	2013-04-26 07:56:22	Yes		Magpie	Feeding	No	No	No	2
6376364	110	2013-04-26 21:59:46	Yes		Coyote	Feeding	No	No	No	1
6376365	110	2013-04-26 22:17:42	Yes		Coyote	Feeding	No	No	No	1
6376366	110	2013-04-26 23:55:28	Yes		Red fox	Feeding	No	No	No	1
6376367	110	2013-04-26 23:57:40	Yes		Red fox	Feeding	No	No	No	1
6376368	110	2013-04-27 01:23:52	Yes		Red fox	Feeding	No	No	No	1
6376369	110	2013-04-27 02:12:24	Yes		Red fox	Feeding	No	No	No	1
6376370	110	2013-04-27 03:16:14	Yes		Red fox	Feeding	No	No	No	1
6376371	110	2013-04-27 03:18:58	No							0
6376372	110	2013-04-27 03:22:42	Yes		Red fox	Feeding	No	No	No	1
6376373	110	2013-04-27 10:44:20	Yes		Magpie	Feeding	No	No	No	2
6376374	110	2013-04-27 13:45:16	Yes		Vultures	Feeding	No	No	No	1
6376375	110	2013-04-27 13:48:56	Yes		Vultures	Feeding	No	No	No	1
6376376	110	2013-04-27 13:50:42	Yes		Vultures	Feeding	No	No	No	1
6376377	110	2013-04-27 13:52:42	Yes		Vultures	Feeding	No	No	No	2
6376378	110	2013-04-27 13:54:30	Yes		Vultures	Feeding	No	No	No	2
6376379	110	2013-04-27 13:56:40	Yes		Vultures	Feeding	No	No	No	2
6376380	110	2013-04-27 13:58:12	Yes		Vultures	Feeding	No	No	No	2
6376381	110	2013-04-27 14:00:10	Yes		Vultures	Feeding	No	No	No	2
6376382	110	2013-04-27 14:01:46	Yes		Vultures	Feeding	No	No	No	2
6376383	110	2013-04-27 14:03:22	Yes		Vultures	Feeding	No	No	No	2
6376384	110	2013-04-27 14:07:16	Yes		Vultures	Feeding	No	No	No	2
6376385	110	2013-04-27 14:09:02	Yes		Vultures	Feeding	No	No	No	1
6376386	110	2013-04-27 14:11:08	Yes		Vultures	Feeding	No	No	No	1
6376387	110	2013-04-27 14:14:02	Yes		Vultures	Feeding	No	No	No	1
6376388	110	2013-04-27 21:10:58	Yes		Red fox	Walking/Moving	No	No	No	1
6376389	110	2013-04-27 21:13:40	Yes		Red fox	Feeding	No	No	No	1
6376390	110	2013-04-27 21:58:54	Yes		Red fox	Feeding	No	No	No	1
6376391	110	2013-04-27 22:30:26	Yes		Red fox	Walking/Moving	No	No	No	1
6376392	110	2013-04-28 00:22:00	Yes		Red fox	Feeding	No	No	No	1
6376393	110	2013-04-28 00:24:46	Yes		Red fox	Feeding	No	No	No	1
6376394	110	2013-04-28 01:35:04	Yes		Coyote	Feeding	No	No	No	1
6376395	110	2013-04-28 01:36:40	Yes		Coyote	Feeding	No	No	No	1
6376396	110	2013-04-28 01:38:52	Yes		Coyote	Feeding	No	No	No	1
6376397	110	2013-04-28 02:34:36	Yes		Coyote	Feeding	No	No	No	1
6376398	110	2013-04-28 02:36:38	Yes		Coyote	Feeding	No	No	No	1
6376399	110	2013-04-28 11:11:06	Yes		Vultures	Feeding	No	No	No	2
6376400	110	2013-04-28 11:14:34	Yes		Vultures	Feeding	No	No	No	2
6376401	110	2013-04-28 11:19:14	Yes		Vultures	Feeding	No	No	No	2
6376402	110	2013-04-28 11:21:16	Yes		Vultures	Feeding	No	No	No	2
6376403	110	2013-04-28 11:22:56	Yes		Vultures	Feeding	No	No	No	2
6376404	110	2013-04-28 11:24:28	Yes		Vultures	Feeding	No	No	No	2
6376405	110	2013-04-28 11:26:18	Yes		Vultures	Feeding	No	No	No	2
6376406	110	2013-04-28 11:28:30	Yes		Vultures	Feeding	No	No	No	2
6376407	110	2013-04-28 11:30:04	Yes		Vultures	Feeding	No	No	No	2
6376408	110	2013-04-28 11:31:44	Yes		Vultures	Feeding	No	No	No	2
6376409	110	2013-04-28 11:34:06	Yes		Vultures	Feeding	No	No	No	2
6376410	110	2013-04-28 11:35:58	Yes		Vultures	Feeding	No	No	No	2
6376411	110	2013-04-28 11:37:28	Yes		Vultures	Feeding	No	No	No	2
6376412	110	2013-04-28 11:41:14	Yes		Vultures	Feeding	No	No	No	2
6376413	110	2013-04-28 11:46:34	Yes		Vultures	Feeding	No	No	No	2
6376414	110	2013-04-29 02:33:06	Yes		Red fox	Feeding	No	No	No	1
6376415	110	2013-04-29 02:34:44	Yes		Red fox	Feeding	No	No	No	1
6376416	110	2013-04-29 02:36:36	Yes		Red fox	Feeding	No	No	No	1
6376417	110	2013-04-29 02:38:10	Yes		Red fox	Feeding	No	No	No	1
6376418	110	2013-04-29 02:40:06	Yes		Red fox	Feeding	No	No	No	1
6376419	110	2013-04-29 02:41:36	Yes		Red fox	Feeding	No	No	No	1
6376420	110	2013-04-29 02:43:30	Yes		Red fox	Walking/Moving	No	No	No	1
6376421	110	2013-04-29 03:54:32	Yes		Red fox	Feeding	No	No	No	1
6376422	110	2013-04-29 03:58:00	Yes		Red fox	Feeding	No	No	No	1
6376423	110	2013-04-29 03:59:46	Yes		Red fox	Feeding	No	No	No	1
6376424	110	2013-04-29 05:01:52	Yes		Red fox	Feeding	No	No	No	1
6376425	110	2013-04-29 05:03:32	Yes		Red fox	Feeding	No	No	No	1
6376426	110	2013-04-29 05:06:26	Yes		Red fox	Feeding	No	No	No	1
6376427	110	2013-04-29 05:09:56	Yes		Red fox	Walking/Moving	No	No	No	1
6376428	110	2013-04-29 05:19:26	Yes		Red fox	Feeding	No	No	No	1
6376429	110	2013-04-29 05:22:52	Yes		Red fox	Feeding	No	No	No	1
6376430	110	2013-04-29 05:24:22	Yes		Red fox	Feeding	No	No	No	1
6376431	110	2013-04-29 05:25:58	Yes		Red fox	Feeding	No	No	No	1
6376432	110	2013-04-29 05:28:06	Yes		Red fox	Feeding	No	No	No	1
6376433	110	2013-04-29 05:29:54	Yes		Red fox	Feeding	No	No	No	1
6376434	110	2013-04-29 05:31:34	Yes		Red fox	Feeding	No	No	No	1
6376435	110	2013-04-29 05:33:20	Yes		Red fox	Feeding	No	No	No	1
6376436	110	2013-04-29 05:35:04	Yes		Red fox	Feeding	No	No	No	1
6376437	110	2013-04-29 15:54:22	Yes		Vultures	Feeding	No	No	No	1
6376438	110	2013-04-29 15:56:14	Yes		Vultures	Feeding	No	No	No	1
6376439	110	2013-04-29 15:57:48	Yes		Vultures	Feeding	No	No	No	1
6376440	110	2013-04-29 16:02:08	Yes		Vultures	Feeding	No	No	No	2
6376441	110	2013-04-29 16:04:40	Yes		Vultures	Feeding	No	No	No	2
6376442	110	2013-04-29 16:06:58	Yes		Vultures	Feeding	No	No	No	2
6376443	110	2013-04-29 16:10:02	Yes		Vultures	Feeding	No	No	No	2
6376444	110	2013-04-29 23:12:34	Yes		Coyote	Feeding	No	No	No	1
6376445	110	2013-04-29 23:16:46	Yes		Coyote	Feeding	No	No	No	1
6376446	110	2013-04-29 23:18:38	Yes		Coyote	Feeding	No	No	No	1
6376447	110	2013-04-29 23:20:28	Yes		Coyote	Feeding	No	No	No	1
6376448	110	2013-04-29 23:22:48	Yes		Coyote	Feeding	No	No	No	1
6376449	110	2013-04-29 23:24:20	Yes		Coyote	Feeding	No	No	No	1
6376450	110	2013-04-29 23:25:56	Yes		Coyote	Feeding	No	No	No	1
6376451	110	2013-04-29 23:27:28	Yes		Coyote	Feeding	No	No	No	1
6376452	110	2013-04-29 23:29:24	Yes		Coyote	Feeding	No	No	No	1
6376453	110	2013-04-29 23:31:28	Yes		Coyote	Feeding	No	No	No	1
6376454	110	2013-04-29 23:33:22	Yes		Coyote	Feeding	No	No	No	1
6376455	110	2013-04-29 23:35:24	Yes		Coyote	Feeding	No	No	No	1
6376456	110	2013-04-29 23:37:40	Yes		Coyote	Feeding	No	No	No	1
6376457	110	2013-04-29 23:40:04	Yes		Coyote	Feeding	No	No	No	1
6376458	110	2013-04-29 23:42:32	Yes		Coyote	Feeding	No	No	No	1
6376459	110	2013-04-29 23:44:32	Yes		Coyote	Feeding	No	No	No	1
6376460	110	2013-04-29 23:46:10	Yes		Coyote	Feeding	No	No	No	1
6376461	110	2013-04-29 23:48:22	Yes		Coyote	Feeding	No	No	No	1
6376462	110	2013-04-29 23:50:34	Yes		Coyote	Feeding	No	No	No	1
6376463	110	2013-04-29 23:52:14	Yes		Coyote	Feeding	No	No	No	1
6376464	110	2013-04-29 23:55:32	Yes		Coyote	Feeding	No	No	No	1
6376465	110	2013-04-29 23:57:02	Yes		Coyote	Feeding	No	No	No	1
6376466	110	2013-04-29 23:58:54	Yes		Coyote	Feeding	No	No	No	1
6376467	110	2013-04-30 00:00:34	Yes		Coyote	Feeding	No	No	No	1
6376468	110	2013-04-30 00:02:08	Yes		Coyote	Feeding	No	No	No	1
6376469	110	2013-04-30 00:32:20	Yes		Red fox	Feeding	No	No	No	1
6376470	110	2013-04-30 00:35:28	Yes		Red fox	Feeding	No	No	No	1
6376471	110	2013-04-30 00:37:06	Yes		Red fox	Feeding	No	No	No	1
6376472	110	2013-04-30 00:39:10	Yes		Red fox	Feeding	No	No	No	1
6376473	110	2013-04-30 00:41:38	Yes		Red fox	Feeding	No	No	No	1
6376474	110	2013-04-30 00:43:28	Yes		Red fox	Feeding	No	No	No	1
6376475	110	2013-04-30 00:46:50	Yes		Red fox	Feeding	No	No	No	1
6376476	110	2013-04-30 00:49:00	Yes		Red fox	Feeding	No	No	No	1
6376477	110	2013-04-30 00:51:10	No							0
6376478	110	2013-04-30 01:36:34	Yes		Red fox	Feeding	No	No	No	1
6376479	110	2013-04-30 01:38:12	Yes		Red fox	Feeding	No	No	No	1
6376480	110	2013-04-30 01:40:50	Yes		Red fox	Feeding	No	No	No	1
6376481	110	2013-04-30 01:42:40	Yes		Red fox	Feeding	No	No	No	1
6376482	110	2013-04-30 01:44:16	Yes		Red fox	Feeding	No	No	No	1
6376483	110	2013-04-30 01:47:12	Yes		Red fox	Feeding	No	No	No	1
6376484	110	2013-04-30 01:49:20	Yes		Red fox	Feeding	No	No	No	1
6376485	110	2013-04-30 01:51:02	Yes		Red fox	Feeding	No	No	No	1
6376486	110	2013-04-30 01:53:08	Yes		Red fox	Feeding	No	No	No	1
6376487	110	2013-04-30 01:55:34	Yes		Red fox	Feeding	No	No	No	1
6376488	110	2013-04-30 01:57:42	Yes		Red fox	Feeding	No	No	No	1
6376489	110	2013-04-30 02:00:24	Yes		Red fox	Feeding	No	No	No	1
6376490	110	2013-04-30 02:04:36	Yes		Red fox	Feeding	No	No	No	1
6376491	110	2013-04-30 02:06:12	Yes		Red fox	Feeding	No	No	No	1
6376492	110	2013-04-30 02:32:16	Yes		Red fox	Feeding	No	No	No	1
6376493	110	2013-04-30 02:33:54	Yes		Red fox	Feeding	No	No	No	1
6376494	110	2013-04-30 02:35:58	Yes		Red fox	Feeding	No	No	No	1
6376495	110	2013-04-30 02:39:44	Yes		Red fox	Feeding	No	No	No	1
6376496	110	2013-04-30 08:13:00	Yes		Magpie	Feeding	No	No	No	2
6376497	110	2013-04-30 11:45:16	No							0
6376498	110	2013-04-19 11:09:44	No							0
6376499	110	2013-04-19 11:14:46	No							0
6376500	110	2013-04-19 20:52:20	Yes	F109		Feeding	No	No	No	1
6376501	110	2013-04-19 20:56:00	Yes	F109		Feeding	No	No	No	1
6376502	110	2013-04-19 20:58:16	Yes	F109		Feeding	No	No	No	1
6376503	110	2013-04-19 21:18:52	Yes	F109		Feeding	No	No	No	1
6376504	110	2013-04-19 21:20:58	Yes	F109		Feeding	No	No	No	1
6376505	110	2013-04-19 21:24:40	Yes	F109		Walking/Moving	No	No	No	1
6376506	110	2013-04-20 03:39:00	Yes	F109		Feeding	No	No	No	1
6376507	110	2013-04-20 03:40:40	Yes	F109		Feeding	No	No	No	1
6376508	110	2013-04-20 03:42:28	Yes	F109		Feeding	No	No	No	1
6376509	110	2013-04-20 03:44:42	Yes	F109		Feeding	No	No	No	1
6376510	110	2013-04-20 03:46:26	Yes	F109		Feeding	No	No	No	1
6376511	110	2013-04-20 03:48:12	Yes	F109		Feeding	No	No	No	1
6376512	110	2013-04-20 03:54:08	Yes	F109		Feeding	No	No	No	1
6376513	110	2013-04-20 05:21:04	Yes	F109		Caching	No	No	No	1
6376514	110	2013-04-20 05:52:04	Yes		Red fox	Feeding	No	No	No	1
6376515	110	2013-04-20 21:04:40	No							0
6376516	110	2013-04-20 21:24:44	No							0
6376517	110	2013-04-21 03:23:22	No							0
6376518	110	2013-04-21 03:27:48	No							0
6376519	110	2013-04-21 03:30:10	No							0
6376520	110	2013-04-21 03:36:36	No							0
6376521	110	2013-04-21 03:39:02	No							0
6376522	110	2013-04-21 03:44:58	No							0
6376523	110	2013-04-21 03:48:52	No							0
6376524	110	2013-04-21 03:55:24	No							0
6376525	110	2013-04-21 03:57:04	No							0
6376526	110	2013-04-21 03:58:50	No							0
6376527	110	2013-04-21 04:30:40	No							0
6376528	110	2013-04-21 04:45:24	No							0
6376529	110	2013-04-21 09:10:56	No							0
6376530	110	2013-04-21 12:43:26	Yes		Magpie	Feeding	No	No	No	1
6376531	110	2013-04-21 20:58:44	Yes		American marten	Feeding	No	No	No	1
6376532	110	2013-04-21 21:49:04	Yes	F109		Feeding	No	No	No	1
6376533	110	2013-04-22 02:19:54	Yes		American marten	Feeding	No	No	No	1
6376534	110	2013-04-22 04:22:02	Yes	F109		Feeding	No	No	No	1
6376535	110	2013-04-22 04:23:42	Yes	F109		Feeding	No	No	No	1
6376536	110	2013-04-22 04:30:50	Yes	F109		Feeding	No	No	No	1
6376537	110	2013-04-22 04:49:38	Yes	F109		Feeding	No	No	No	1
6376538	110	2013-04-22 05:09:56	Yes		Red fox	Feeding	No	No	No	1
6376539	110	2013-04-22 05:14:04	Yes		Red fox	Feeding	No	No	No	1
6376540	110	2013-04-22 05:29:34	Yes		Red fox	Feeding	No	No	No	2
6376541	110	2013-04-22 15:19:54	No							0
6376542	110	2013-04-22 15:20:52	No							0
6376543	110	2013-04-19 11:13:58	No							0
6376544	110	2013-04-19 11:15:28	No							0
6376545	110	2013-04-19 11:17:08	No							0
6376546	110	2013-04-19 11:32:54	Yes		Magpie	Feeding	No	No	No	2
6376547	110	2013-04-19 11:34:30	Yes		Magpie	Feeding	Yes	No	No	2
6376548	110	2013-04-19 11:36:26	Yes		Magpie	Feeding	No	No	No	2
6376549	110	2013-04-19 11:40:18	Yes		Magpie	Feeding	No	No	No	1
6376550	110	2013-04-19 19:36:00	Yes	F109		Walking/Moving	No	No	No	1
6376551	110	2013-04-19 20:53:12	Yes	F109		Feeding	No	No	No	1
6376552	110	2013-04-19 20:54:54	Yes	F109		Feeding	No	No	No	1
6376553	110	2013-04-19 20:56:24	Yes	F109		Feeding	No	No	No	1
6376554	110	2013-04-19 20:57:58	Yes	F109		Feeding	No	No	No	1
6376555	110	2013-04-19 20:59:28	Yes	F109		Feeding	No	No	No	1
6376556	110	2013-04-19 21:00:58	Yes	F109		Feeding	No	No	No	1
6376557	110	2013-04-19 21:02:32	Yes	F109		Feeding	No	No	No	1
6376558	110	2013-04-19 21:04:02	Yes	F109		Feeding	No	No	No	1
6376559	110	2013-04-19 21:05:34	Yes	F109		Feeding	No	No	No	1
6376560	110	2013-04-19 21:07:04	Yes	F109		Feeding	No	No	No	1
6376561	110	2013-04-19 21:08:38	Yes	F109		Feeding	No	No	No	1
6376562	110	2013-04-19 21:10:08	Yes	F109		Feeding	No	No	No	1
6376563	110	2013-04-19 21:11:44	Yes	F109		Feeding	No	No	No	1
6376564	110	2013-04-19 21:13:16	Yes	F109		Feeding	No	No	No	1
6376565	110	2013-04-19 21:14:48	Yes	F109		Feeding	No	No	No	1
6376566	110	2013-04-19 21:16:22	Yes	F109		Feeding	No	No	No	1
6376567	110	2013-04-19 21:17:54	Yes	F109		Feeding	No	No	No	1
6376568	110	2013-04-19 21:19:24	Yes	F109		Feeding	No	No	No	1
6376569	110	2013-04-19 21:20:58	Yes	F109		Feeding	No	No	No	1
6376570	110	2013-04-19 21:22:28	Yes	F109		Feeding	No	No	No	1
6376571	110	2013-04-19 21:24:00	Yes	F109		Feeding	No	No	No	1
6376572	110	2013-04-19 21:25:30	No							0
6376573	110	2013-04-20 03:38:58	Yes	F109		Feeding	No	No	No	1
6376574	110	2013-04-20 03:40:30	Yes	F109		Feeding	No	No	No	1
6376575	110	2013-04-20 03:42:08	Yes	F109		Feeding	No	No	No	1
6376576	110	2013-04-20 03:43:56	Yes	F109		Feeding	No	No	No	1
6376577	110	2013-04-20 03:45:28	Yes	F109		Feeding	No	No	No	1
6376578	110	2013-04-20 03:47:30	Yes	F109		Feeding	No	No	No	1
6376579	110	2013-04-20 03:49:00	Yes	F109		Feeding	No	No	No	1
6376580	110	2013-04-20 03:50:40	Yes	F109		Feeding	No	No	No	1
6376581	110	2013-04-20 03:52:10	Yes	F109		Feeding	No	No	No	1
6376582	110	2013-04-20 03:53:42	Yes	F109		Feeding	No	No	No	1
6376583	110	2013-04-20 03:55:14	Yes	F109		Feeding	No	No	No	1
6376584	110	2013-04-20 04:15:02	Yes		Red fox	Feeding	No	No	No	1
6376585	110	2013-04-20 04:16:36	Yes		Red fox	Feeding	No	No	No	1
6376586	110	2013-04-20 05:10:54	Yes	F109		Nothing	No	No	No	1
6376587	110	2013-04-20 05:12:24	Yes	F109		Resting	No	No	No	1
6376588	110	2013-04-20 05:21:42	Yes	F109		Caching	No	No	No	1
6376589	110	2013-04-20 05:23:12	Yes	F109		Caching	No	No	No	1
6376590	110	2013-04-20 05:51:26	Yes		Red fox	Feeding	No	No	No	1
6376591	110	2013-04-20 05:53:26	Yes		Red fox	Feeding	No	No	No	1
6376592	110	2013-04-20 05:54:58	Yes		Red fox	Feeding	No	No	No	1
6376593	110	2013-04-20 05:56:40	Yes		Red fox	Feeding	No	No	No	1
6376594	110	2013-04-20 05:58:26	Yes		Red fox	Feeding	No	No	No	1
6376595	110	2013-04-20 06:00:04	Yes		Red fox	Feeding	No	No	No	1
6376596	110	2013-04-20 06:01:36	Yes		Red fox	Feeding	No	No	No	1
6376597	110	2013-04-20 06:03:10	Yes		Red fox	Feeding	No	No	No	1
6376598	110	2013-04-20 06:05:38	Yes		Red fox	Feeding	No	No	No	1
6376599	110	2013-04-20 06:07:18	Yes		Red fox	Feeding	No	No	No	1
6376600	110	2013-04-20 06:08:54	Yes		Red fox	Feeding	No	No	No	1
6376601	110	2013-04-20 06:10:30	Yes		Red fox	Feeding	No	No	No	1
6376602	110	2013-04-20 06:12:04	Yes		Red fox	Feeding	No	No	No	1
6376603	110	2013-04-20 06:14:22	Yes		Red fox	Feeding	No	No	No	1
6376604	110	2013-04-20 15:08:00	No							0
6376605	110	2013-04-20 15:14:28	Yes		Gray jay	Feeding	No	No	No	1
6376606	110	2013-04-20 15:21:54	Yes		Gray jay	Feeding	No	No	No	1
6376607	110	2013-04-21 03:39:48	No							0
6376608	110	2013-04-21 03:58:46	No							0
6376609	110	2013-04-21 09:23:48	No							0
6376610	110	2013-04-21 09:27:26	No							0
6376611	110	2013-04-21 09:41:30	No							0
6376612	110	2013-04-21 10:05:42	Yes		Gray jay	Feeding	No	No	No	1
6376613	110	2013-04-21 10:50:00	Yes		Gray jay	Feeding	Yes	No	No	1
6376614	110	2013-04-21 10:54:36	Yes		Gray jay	Feeding	No	No	No	1
6376615	110	2013-04-21 11:02:36	Yes		Gray jay	Feeding	Yes	No	No	1
6376616	110	2013-04-21 11:06:06	No							0
6376617	110	2013-04-21 11:09:42	Yes		Gray jay	Feeding	Yes	No	No	1
6376618	110	2013-04-21 11:11:16	No							0
6376619	110	2013-04-21 11:55:16	Yes		Magpie	Feeding	No	No	No	1
6376620	110	2013-04-21 11:57:22	Yes		Magpie	Feeding	No	No	No	1
6376621	110	2013-04-21 12:07:58	Yes		Magpie	Feeding	No	No	No	1
6376622	110	2013-04-21 12:15:20	Yes		Magpie	Feeding	No	No	No	1
6376623	110	2013-04-21 12:41:56	Yes		Magpie	Feeding	Yes	No	No	1
6376624	110	2013-04-21 12:44:02	Yes		Magpie	Feeding	Yes	No	No	1
6376625	110	2013-04-21 12:51:42	Yes		Gray jay	Feeding	Yes	No	No	1
6376626	110	2013-04-21 13:00:34	Yes		Gray jay	Feeding	Yes	No	No	1
6376627	110	2013-04-21 13:49:02	No							0
6376628	110	2013-04-21 14:14:06	No							0
6376629	110	2013-04-21 20:56:24	Yes		American marten	Feeding	No	No	No	1
6376630	110	2013-04-21 20:59:30	Yes		American marten	Feeding	No	No	No	1
6376631	110	2013-04-21 21:01:00	Yes		American marten	Feeding	No	No	No	1
6376632	110	2013-04-21 21:02:34	Yes		American marten	Feeding	No	No	No	1
6376633	110	2013-04-21 21:24:40	Yes		American marten	Feeding	No	No	No	1
6376634	110	2013-04-21 21:26:16	Yes		American marten	Feeding	No	No	No	1
6376635	110	2013-04-21 21:28:04	Yes		American marten	Feeding	No	No	No	1
6376636	110	2013-04-21 21:30:26	Yes		American marten	Feeding	No	No	No	1
6376637	110	2013-04-21 21:49:50	Yes	F109		Feeding	Yes	No	No	1	gutteral hiss
6376638	110	2013-04-21 21:51:20	Yes	F109		Feeding	No	No	No	1
6376639	110	2013-04-21 21:52:52	Yes	F109		Feeding	No	No	No	1
6376640	110	2013-04-21 21:54:28	Yes	F109		Feeding	No	No	No	1
6376641	110	2013-04-21 21:55:58	Yes	F109		Feeding	No	No	No	1
6376642	110	2013-04-21 21:57:42	Yes	F109		Feeding	No	No	No	1
6376643	110	2013-04-21 21:59:20	Yes	F109		Feeding	No	No	No	1
6376644	110	2013-04-21 22:00:52	Yes	F109		Feeding	No	No	No	1
6376645	110	2013-04-21 22:02:22	Yes	F109		Feeding	No	No	No	1
6376646	110	2013-04-21 22:03:54	Yes	F109		Feeding	No	No	No	1
6376647	110	2013-04-21 22:05:26	Yes	F109		Feeding	No	No	No	1
6376648	110	2013-04-21 22:07:00	Yes	F109		Feeding	No	No	No	1
6376649	110	2013-04-21 22:08:34	Yes	F109		Feeding	No	No	No	1
6376650	110	2013-04-21 22:10:12	Yes	F109		Feeding	No	No	No	1
6376651	110	2013-04-21 22:12:06	Yes	F109		Feeding	No	No	No	1
6376652	110	2013-04-21 22:13:40	Yes	F109		Feeding	No	No	No	1
6376653	110	2013-04-21 22:15:12	Yes	F109		Feeding	No	No	No	1
6376654	110	2013-04-21 22:16:42	Yes	F109		Feeding	No	No	No	1
6376655	110	2013-04-21 22:18:14	Yes	F109		Feeding	No	No	No	1
6376656	110	2013-04-21 22:19:44	Yes	F109		Feeding	No	No	No	1
6376657	110	2013-04-21 22:21:18	Yes	F109		Feeding	No	No	No	1
6376658	110	2013-04-21 22:22:50	Yes	F109		Feeding	No	No	No	1
6376659	110	2013-04-21 22:24:24	Yes	F109		Feeding	No	No	No	1
6376660	110	2013-04-21 22:26:08	Yes	F109		Feeding	No	No	No	1
6376727	110	2013-04-22 12:21:58	Yes		Magpie	Feeding	No	No	No	1
6376728	110	2013-04-22 12:23:52	Yes		Magpie	Feeding	No	No	No	1
6376729	110	2013-04-22 12:29:20	Yes		Magpie	Feeding	No	No	No	1
6376730	110	2013-04-22 12:31:56	No							0
6376731	110	2013-04-22 12:34:04	No							0
6376732	110	2013-04-22 12:38:18	No							0
6376733	110	2013-04-22 12:46:08	No							0
6376734	110	2013-04-22 12:48:34	No							0
6376735	110	2013-04-22 12:50:26	No							0
6376736	110	2013-04-22 13:09:56	No							0
6376737	110	2013-04-22 13:12:12	No							0
6376738	110	2013-04-22 13:14:06	No							0
6376739	110	2013-04-22 13:17:24	No							0
6376740	110	2013-04-22 13:19:22	No							0
6376741	110	2013-04-22 13:21:44	No							0
6376742	110	2013-04-22 13:26:20	No							0
6376743	110	2013-04-22 13:29:04	Yes		Gray jay	Feeding	No	No	No	1
6376744	110	2013-04-22 13:31:04	Yes		Gray jay	Feeding	No	No	No	1
6376745	110	2013-04-22 13:34:14	Yes		Gray jay	Feeding	Yes	No	No	1
6376746	110	2013-04-22 13:36:52	Yes		Gray jay	Feeding	Yes	No	Yes	2
6376747	110	2013-04-22 13:40:26	No							0
6376748	110	2013-04-22 13:44:52	No							0
6376749	110	2013-04-22 13:46:22	No							0
6376750	110	2013-04-22 13:48:06	No							0
6376751	110	2013-04-22 13:52:10	No							0
6376752	110	2013-04-22 13:54:08	No							0
6376753	110	2013-04-22 13:55:50	No							0
6376754	110	2013-04-22 13:57:34	No							0
6376755	110	2013-04-22 13:59:54	No							0
6376756	110	2013-04-22 14:07:04	No							0
6376757	110	2013-04-22 14:08:40	No							0
6376758	110	2013-04-22 14:10:10	No							0
6376759	110	2013-04-22 14:14:24	No							0
6376760	110	2013-04-22 14:17:26	No							0
6376761	110	2013-04-22 14:20:46	No							0
6376762	110	2013-04-22 14:32:08	No							0
6376763	110	2013-04-22 14:34:08	No							0
6376764	110	2013-04-22 14:44:12	No							0
6376765	110	2013-04-22 14:56:32	No							0
6376766	110	2013-04-22 15:07:40	No							0
6376767	110	2013-04-22 15:20:38	No							0	Grizzly Bear is Collared
5643416	1115	2014-07-26 19:49:28	Yes		Mule deer	Nothing	No	No	No	1
5643417	1115	2014-07-27 03:05:18	Yes		Red fox	Nothing	No	No	No	1
5643377	1115	2014-07-17 21:01:02	Yes		Mule deer	Nothing	No	No	No	1
5643378	1115	2014-07-17 22:42:04	Yes		Red fox	Nothing	No	No	No	1
5643379	1115	2014-07-17 22:45:30	Yes		Red fox	Nothing	No	No	No	1
5643380	1115	2014-07-17 22:47:40	Yes		Red fox	Feeding	No	No	No	1
5643381	1115	2014-07-17 22:57:20	No							0
5643382	1115	2014-07-17 22:59:24	Yes		Red fox	Feeding	No	No	No	1
5643383	1115	2014-07-17 23:01:22	Yes		Red fox	Feeding	No	No	No	1
5643384	1115	2014-07-18 01:20:04	No							0
5643385	1115	2014-07-18 02:50:24	Yes		Red fox	Feeding	No	No	No	1
5643386	1115	2014-07-18 02:56:20	Yes		Red fox	Feeding	No	No	No	1
5643387	1115	2014-07-18 03:08:36	No							0
5643388	1115	2014-07-18 03:12:50	Yes		Red fox	Feeding	No	No	No	1
5643389	1115	2014-07-18 18:21:38	Yes		Vultures	Feeding	No	No	No	5
5643390	1115	2014-07-18 18:25:06	Yes		Vultures	Feeding	No	No	No	5
5643391	1115	2014-07-18 18:52:00	Yes		Vultures	Feeding	No	No	No	4
5643392	1115	2014-07-18 18:53:46	Yes		Vultures	Feeding	No	No	No	4
5643393	1115	2014-07-18 18:55:28	Yes		Vultures	Feeding	No	No	No	4
5643394	1115	2014-07-18 19:00:24	Yes		Vultures	Feeding	No	No	No	4
5643395	1115	2014-07-18 19:02:38	Yes		Vultures	Feeding	No	No	No	4
5643396	1115	2014-07-18 19:05:30	Yes		Vultures	Feeding	No	No	No	4
5643397	1115	2014-07-18 19:07:40	Yes		Vultures	Feeding	No	No	No	4
5643398	1115	2014-07-18 19:10:22	Yes		Vultures	Feeding	No	No	No	4
5643399	1115	2014-07-18 19:12:48	Yes		Vultures	Feeding	No	No	Yes	4
5643400	1115	2014-07-18 19:55:18	Yes		Vultures	Feeding	No	No	No	2
5643401	1115	2014-07-18 19:56:52	Yes		Vultures	Feeding	No	No	No	2
5643402	1115	2014-07-18 20:35:38	Yes		Red fox	Nothing	No	No	No	1	black phase fox
5643403	1115	2014-07-18 20:40:42	Yes		Red fox	Feeding	No	No	No	1	black phase fox
5643404	1115	2014-07-18 21:01:06	Yes		Red fox	Feeding	No	No	No	1	black phase fox
5643405	1115	2014-07-18 21:13:52	Yes		Red fox	Nothing	No	No	No	1
5643406	1115	2014-07-19 01:57:10	Yes		Red fox	Feeding	No	No	No	1	black phase fox
5643407	1115	2014-07-19 02:05:56	Yes		Red fox	Feeding	No	No	No	1	black phase fox
5643408	1115	2014-07-19 08:55:06	Yes		Vultures	Feeding	No	No	No	2
5643409	1115	2014-07-19 21:30:46	No							0
5643410	1115	2014-07-19 21:32:52	Yes		Red fox	Nothing	No	No	No	1	black phase fox
5643411	1115	2014-07-23 03:58:40	Yes		Red fox	Feeding	No	No	No	1
5643412	1115	2014-07-24 14:10:04	No							0
5643413	1115	2014-07-24 14:37:34	No							0
5643414	1115	2014-07-26 19:44:10	Yes		Mule deer	Nothing	No	No	No	1
5643415	1115	2014-07-26 19:48:00	Yes		Mule deer	Nothing	No	No	No	1
4586803	1131	2014-06-29 09:00:34	No							0
4586804	1131	2014-06-29 09:55:48	No							0
4586805	1131	2014-06-29 09:57:00	No							0
4586806	1131	2014-06-30 05:49:46	Yes		Red fox	Feeding	No	No	No	1	good alarms on a red fox
4586807	1131	2014-06-30 05:55:18	Yes		Red fox	Feeding	No	No	No	1	good alarms on a red fox
4586808	1131	2014-06-30 05:59:06	Yes		Red fox	Feeding	No	No	No	1
4586809	1131	2014-06-30 06:07:56	Yes		Red fox	Feeding	No	No	No	1
4586810	1131	2014-06-30 06:13:36	Yes		Red fox	Feeding	No	No	No	1	robin alarms a fox
4586811	1131	2014-06-30 06:23:44	Yes		Red fox	Feeding	No	No	No	1
4586812	1131	2014-06-30 06:31:52	Yes		Red fox	Feeding	No	No	No	1
4586813	1131	2014-06-30 07:28:38	Yes		Red fox	Feeding	No	No	No	1
4586814	1131	2014-06-30 07:33:58	Yes		Red fox	Feeding	No	No	No	1
4586815	1131	2014-06-30 07:40:38	Yes		Red fox	Feeding	No	No	No	1	amazing shot of fox with mouth full of meat
4586816	1131	2014-06-30 18:43:10	Yes		Red fox	Nothing	No	No	No	1
4586817	1131	2014-07-04 10:44:52	No							0
4586818	1131	2014-07-04 10:44:58	No							0
4608815	1131	2014-06-29 11:13:40	No							0
4608816	1131	2014-06-29 23:14:50	Yes	F61		Feeding	No	No	No	1
4608817	1131	2014-06-29 23:20:44	Yes	F61		Feeding	No	No	No	1
4608818	1131	2014-06-29 23:23:40	Yes	F61		Feeding	No	No	No	1
[truncated: 114,299 more rows]
